1 **Title:**

2 Rice bran supplementation modulates growth, microbiome and metabolome in weaning  
3 infants: a clinical trial in Nicaragua and Mali

4 **Authors and Affiliations:**

5 Luis E. Zambrana<sup>1,2</sup>, Starin McKeen<sup>1</sup>, Hend Ibrahim<sup>1,3</sup>, Iman Zarei<sup>1</sup>, Erica C. Borresen<sup>1</sup>,  
6 Lassina Doumbia<sup>4</sup>, Abdoulaye Bore<sup>4</sup>, Alima Cissoko<sup>4</sup>, Seydou Douyon<sup>4</sup>, Karim Kone<sup>4</sup>,  
7 Johann Perez<sup>2</sup>, Claudia Perez<sup>2</sup>, Ann Hess<sup>5</sup>, Zaid Abdo<sup>6</sup>, Lansana Sangare<sup>4</sup>, Ababacar  
8 Maiga<sup>4</sup>, Sylvia Becker-Dreps<sup>7</sup>, Lijuan Yuan<sup>8</sup>, Ousmane Koita<sup>4\*</sup>, Samuel Vilchez<sup>2\*</sup>, &  
9 Elizabeth P. Ryan<sup>1\*</sup>

10 <sup>1</sup>Department of Environmental and Radiological Health Sciences, Colorado State  
11 University, Fort Collins, CO 80523, USA.

12 <sup>2</sup>Center of Infectious Diseases, Department of Microbiology and Parasitology, Faculty of  
13 Medical Sciences, National Autonomous University of Nicaragua, León (UNAN-León),  
14 León, Nicaragua.

15 <sup>3</sup>Department of Medical Biochemistry, Faculty of Medicine, Zagazig University, Zagazig,  
16 Egypt.

17 <sup>4</sup>Laboratoire de Biologie Moléculaire Appliquée, Campus de Badalabougou, Université des  
18 Sciences, des Techniques et des Technologies de Bamako, BP: 1805, Bamako, Mali

19  
20 <sup>5</sup>Department of Statistics, Colorado State University, Fort Collins, CO 80523, USA.

21 <sup>6</sup>Department of Microbiology, Immunology and Pathology, Colorado State University, Fort  
22 Collins, CO 80521, USA.

23 <sup>7</sup>Departments of Family Medicine and Epidemiology, University of North Carolina at  
24 Chapel Hill, Chapel Hill, NC, 27599-7595, USA.

25 <sup>8</sup>Department of Biomedical Sciences and Pathobiology, Virginia-Maryland College of  
26 Veterinary Medicine, Virginia Polytechnic Institute and State University, Blacksburg, VA,  
27 24061, USA.

28 **\*Co-corresponding Authors:**

29 Elizabeth P. Ryan, PhD  
30 Department of Environmental and Radiological Health Sciences  
31 Colorado State University  
32 200 W. Lake St.  
33 1680 Campus Delivery  
34 Fort Collins, CO 80523-1680  
35 Phone: (970) 491-1536  
36 Fax: (970) 491-7569  
37 Email: [E.P.Ryan@colostate.edu](mailto:E.P.Ryan@colostate.edu)

38

39 Samuel Vilchez, PhD

40 Department of Microbiology and Parasitology

41 National Autonomous University of Nicaragua

42 UNAN-León

43 Campus Médico 2do Piso

44 León, Nicaragua Phone: (505) 2311-0022 ext 2155

45 Email: [samuelyilchez@gmail.com](mailto:samuelyilchez@gmail.com)

46

47 Ousmane Koita, PhD

48 University of Science Techniques and Technologies at Bamako, Mali.

49 Phone: (223) 6363-8888

50 Email: [okoita@icermali.org](mailto:okoita@icermali.org)

51

52 **One Sentence Summary:**

53 Dietary rice bran supplementation during infant weaning from 6-12 months of age  
54 improved growth outcomes, modulated environmental enteric dysfunction biomarkers, and  
55 supported metabolism by the gut microbiome.

56

57 The authors declare no competing financial or non financial interests to disclose as defined  
58 by Nature Research. There are also no other interests that might be perceived to influence  
59 the results and/or discussion reported in this paper.

60

61 Correspondence and requests for materials should be addressed to Dr. Elizabeth Ryan  
62 ([e.p.ryan@colostate.edu](mailto:e.p.ryan@colostate.edu)).

63

64

65

66

67

68

69

70

71

72

73

74

75

76

77

78

79 **Abstract:**

80 Rice bran supplementation provides nutrients, prebiotics and phytochemicals that enhance  
81 gut immunity, reduce enteric pathogens in mice and diarrhea in neonatal pigs, and  
82 warranted attention for improvement of environmental enteric dysfunction (EED) in  
83 children at risk. EED is a condition that drives childhood stunting via intestinal dysbiosis  
84 and impaired nutrient metabolism. This study investigated effects of rice bran  
85 supplementation on growth, EED biomarkers, gut microbiome and metabolome in weaning  
86 infants from 6 to 12 months old in Nicaragua and Mali. Healthy infants were randomized to  
87 a control group or rice bran group that received daily supplementation at increasing doses  
88 each month. Stool microbiomes were characterized using 16S rDNA amplicon sequencing.  
89 Stool metabolomes were analyzed using ultra-high-performance liquid-chromatography  
90 tandem mass-spectrometry. Statistical comparisons were completed at 6, 8, and 12 months  
91 of age. Daily consumption of rice bran was safe and feasible for infant growth, decreasing  
92 alpha-1 antitrypsin levels, and modulating gut microbiome and metabolome when  
93 compared to control. Rice bran merits investigation as a practical intervention strategy that  
94 could decrease EED prevalence and risk for children from low- and middle-income  
95 countries where rice is grown as a staple food, and bran is used as animal feed or wasted.

96

97

98

99

100

## 101 **Introduction**

102           The prevalence of malnutrition in low and middle-income countries (LMIC) has  
103 negative consequences on growth of children during the first five years of life and has  
104 lifelong health consequences<sup>1,2</sup>. There is an increased risk of death among children under 5  
105 years of age due to underweight, stunting, or wasting conditions<sup>2,3</sup>. Risk factors for  
106 undernutrition may include, but are not limited to: low birth weight, inadequate  
107 breastfeeding, improper complementary feeding, and recurrent infections<sup>3,4</sup>. Diarrheal  
108 diseases are also some of the primary causes of undernutrition in children under five years  
109 of age<sup>1,3,4</sup>.

110           Environmental enteric dysfunction (EED) is an acquired subclinical condition of the  
111 small intestine among LMIC children<sup>5-10</sup>. Chronic exposure to enteric pathogens early in  
112 life is one likely contributor to EED<sup>11</sup>. The altered gastrointestinal functions in EED  
113 include intestinal nutrient malabsorption and increased intestinal permeability that leads to  
114 protein loss<sup>6,7</sup>. Infant weaning has been identified as a critical window for intervention<sup>12</sup>.  
115 Previous intervention efforts in young children have targeted micronutrient deficiencies,  
116 such as Vitamin A, Zn and Fe<sup>13-16</sup>, oral rehydration salts for treating diarrhea<sup>17</sup>,  
117 antimicrobial use<sup>18,19</sup>, and community hygiene improvements<sup>20</sup>.

118           Rice bran is a nutrient dense food with bioactive phytochemicals shown to prevent  
119 enteric pathogens and diarrheal disease in mice and pigs<sup>21-24</sup>, and favorably promotes gut  
120 health in adults<sup>25,26</sup>. The effect of rice bran supplementation on host resistance to enteric  
121 infections and enhanced gut mucosal immunity was demonstrated for *Salmonella enterica*

122 Typhimurium<sup>23,24</sup>, rotavirus<sup>27-29</sup>, and norovirus<sup>21</sup>. Rice bran merits attention because it is  
123 widely available for consumption globally<sup>30</sup>, and particularly in LMIC regions where EED  
124 is prevalent<sup>31</sup>.

125 Stool EED biomarkers, gut microbiome<sup>32</sup> and metabolome analysis<sup>15,33</sup> became  
126 important surrogate markers for analysis as intestinal tissue from infants is not easily  
127 accessible to evaluate. Stool myeloperoxidase (MPO)<sup>34</sup>, calprotectin (CAL)<sup>35</sup>, and  
128 neopterin (NEO)<sup>36</sup> are indicators of inflammation; and alpha-1-antitrypsin (AAT)<sup>34</sup> is an  
129 indicator of barrier lumen disruption. Chronic, elevated concentrations of all four  
130 biomarkers have been associated with poor linear growth in infants up to 24 months old  
131<sup>10,34-36</sup>, and as the gut microbiome is maturing over the first 3 years of life<sup>37,38</sup>. Gut  
132 microbiome composition and metabolism is influenced by delivery mode, environment, and  
133 nutrition<sup>39,40</sup>. Recent studies have demonstrated that malnutrition and immature  
134 microbiomes of infants are only partially, and temporarily improved by some nutritional  
135 interventions<sup>15,41</sup>. The nutritional composition and metabolic profile of rice bran, which  
136 comprises a large suite of bioactive molecules, showed benefits in animal studies that  
137 provided important rationale for investigation of dietary feasibility in weaning infants and  
138 for improving growth in LMIC children.

139 The major objective of this study was to investigate effects of dietary rice bran  
140 supplementation during infant weaning on growth, EED biomarkers, gut microbiome and  
141 metabolome from six to twelve months of age in Nicaragua and Mali. The findings support  
142 that daily consumption of rice bran for six months is tolerable, safe and feasible for children  
143 during weaning and was associated with improved growth and decreased gut permeability  
144 via favorable modulation of the gut microbiome and metabolome.

145

## 146 **Results**

### 147 **Rice bran supplementation is safe and feasible for weaning infants**

148 Daily rice bran consumption was completed in a randomized controlled trial with  
149 infants from 6 to 12 months of age. To study the effect of daily rice bran supplementation  
150 on the gut, monthly stool samples from 47 Nicaraguan and 48 Malian children were  
151 collected (average of 7 samples per child, total of 567 samples). The flow and number of  
152 infants from study recruitment to study completion is shown in **Fig. 1**. Baseline participant  
153 characteristics for Nicaragua and Mali are shown in **Table 1**. We collected information on  
154 demographic factors and infants' household characteristics. In Nicaragua, 54.2% of infants  
155 were born via caesarean section in the control group and 30.4% in the rice bran group. All  
156 participants from Mali were delivered vaginally. For breastfeeding status, 96% of the  
157 control group and 83% in the rice bran group were consuming breast milk at six months old  
158 in Nicaragua and all children in the Mali group were consuming breast milk at the  
159 beginning and throughout the study. Of the 95 infants enrolled, 52 received antibiotics with  
160 87 total antibiotic courses in the six-month period. Most courses consisted of systemic  
161 antibiotics given orally, with some delivered by injection for respiratory, skin, ear or  
162 diarrheal infections.

163 Dietary compliance to rice bran was averaged per month during the 6-month  
164 intervention with no adverse events related to rice bran intake at the increasing doses over  
165 time. Compliance to the rice bran intervention in Nicaragua was 90% and in Mali was >  
166 99%. The feasibility and tolerability for infants to consume rice bran at increasing doses (1-  
167 5g/day) over the six month study period was demonstrated when mothers fed rice bran

168 powder alone or reported consumption with drinking water, staple grain porridges (i.e.  
169 millet, sorghum, and white rice), soups, milk, fruits, juices, eggs, and fish when available.

### 170 **Rice bran supplementation increases infant growth**

171 Anthropometric data was collected using standardized procedures across study sites  
172 at 6, 8, and 12 months of age for each child and included length-for-age Z-score (LAZ),  
173 weight-for-age Z-score (WAZ) and weight-for-length Z-score (WLZ). **Table 2** reports the  
174 z-scores analyzed by repeated measures and adjusted by treatment (rice bran) and age (6-8  
175 months and 8-12 months) by country. Significant differences were observed for  
176 anthropometric measures between treatment, and ages in both cohorts. In Nicaraguan  
177 infants consuming rice bran, LAZ was significant over time (1.18 at 6-8 months, p-value=  
178 0.0000; 0.35 at 8-12 months, p-value= 0.0002) and for WLZ at 6-8 months (p-value=  
179 0.0000), with no changes detected in WAZ. Malian infants consuming rice bran had  
180 significant growth results for WAZ (6-8 months, p-value= 0.0001, 8-12 months, p-value=  
181 0.0175) and WLZ (6-8 months, p-value= 0.0141, 8-12 months, p-value= 0.0134). **Fig. 2**  
182 displays LAZ, WAZ and WLZ over time and by country. The significant increase in LAZ  
183 at 8 months and 12 months in Nicaraguan infants that consumed rice bran was compared to  
184 control group (**Fig. 2A**,  $p < 0.01$ ). No significant differences were observed for WAZ and  
185 WLZ with this control group comparison (**Fig. 2B** and **2C**).

### 186 **Rice bran modulation of environmental enteric dysfunction biomarkers**

187 Four EED stool biomarkers were selected for analysis at 6, 8 and 12 months of age  
188 using ELISA (see materials and methods). A significant decrease in AAT was observed at  
189 12 months of age ( $p=0.0368$ ) in Nicaragua infants that consumed rice bran compared to  
190 control (**Table 3**). No significant differences were detected in NEO, MPO and CAL

191 between treatment groups, however a slight decrease in median concentrations of all stool  
192 EED biomarkers were observed in the rice bran group compared to control in both  
193 countries that can be applied for future study sample size and power calculations.

#### 194 **Rice bran modulates gut microbial communities in Nicaraguan and Malian infants**

195 The microbiome was characterized and compared for 48 Malian and 47 Nicaraguan  
196 infants at 8 and 12 months of age in the rice bran and control study groups. DNA was  
197 isolated from stool samples and the V4 hypervariable region of the 16S rRNA gene was  
198 sequenced utilizing the Earth Microbiome Project protocol<sup>42-46</sup>. Sequences were  
199 preprocessed for quality assurance and classified into operational taxonomic units (OTUs)  
200 (see materials and methods), and the results were integrated to construct family and genus-  
201 level composition profiles for all 192 samples from both countries. No major differences  
202 were detected in alpha diversity indices (Observed, Shannon, InvSimpson and Richness)  
203 calculated for rice bran group and control group at 8 and 12 months (**Table S1**). Beta  
204 diversity analysis, depicted in the Nonmetric Multidimensional Scaling (NMDS) plot based  
205 on the Bray-Curtis distance measure, indicated complete country-level separation in the  
206 overall gut microbial community composition (**Fig. 3A**). This provided rationale for  
207 separating analyses for the microbiome and metabolite profiles by country.

208 **Fig. 3B** shows the NMDS plot separated by country. This figure highlights  
209 differences in the microbiome between two time periods, 8 and 12 months, which is more  
210 pronounced in the Malian samples. These figures show overlap of microbiomes within each  
211 time period indicating putative similarity between the microbial community structures  
212 during growth periods. This overlap was observed to a greater level at 8 months of age as  
213 compared to 12 months that may illustrate microbial adaptation to new exposures<sup>31</sup>.



214 **Fig. 4** illustrates the taxa (on the OTU level) with at least 2 log-fold change between  
215 the rice bran and control groups per country and per age group. These taxa were ordered  
216 based on significance, measured by the FDR-adjusted p-value, from bottom (most  
217 significant) to top (details are provided in **Table S2** for Nicaragua and **Table S3** for Mali).  
218 Given the measurable differences in growth between groups by 8 months of age, the effect  
219 of daily dietary supplementation of rice bran on the infant microbiome was compared to the  
220 control group at 8 months.

221 In Nicaragua, we identified 145 OTUs that were significantly different between  
222 control and rice bran across the samples (Table S2), 74 of which showed greater than or  
223 equal to 2 log fold differences between rice bran and control groups at 8 or 12 months (Fig.  
224 4A, adjusted p-value <0.05). Seven of these 74 OTUs overlapped between the ages 8 and  
225 12 months. In Mali, 42 bacterial OTUs were identified to significantly differ between  
226 control and rice bran across samples, and 19 showed more than 2 log fold changes between  
227 rice bran and control at 8 or 12 months (Fig. 4B, adjusted p-value < 0.05) with only three  
228 overlapping between the two age groups. Next we explored the country specific changes in  
229 genus level taxa that were responsive to rice bran intake. For Nicaraguan infants (**Table**  
230 **S2**), the notable rice bran responsive taxa which increased at 8 months of age compared to  
231 control group were Lachnospiraceae-unclassified-Otu0280 (log-FC 5.84, adjusted p-value  
232 3.95E-08) Bifidobacterium-unclassified-Otu0314 (log-FC 2.04, adjusted p-value 1.38E-6),  
233 Ruminococcaceae-unclassified-Otu0238 (log-FC 2.01, adjusted p-value 0.00097),  
234 Veillonella (11 different OTUs, log-FC > 2.0, adjusted p-value < 0.05), and Bacteroides  
235 (log-FC > 2.0, adjusted p-value < 0.05). The fold difference for genus level taxa that were  
236 lower in relative percent abundance for rice bran group were Bacteroides-Otu0192 (log-FC

237 -3.08, adjusted p-value 2.34E-07), Parabacteroides-Otu0086 (log-FC -2.34, adjusted p-  
238 value 0.0074), Lachnospiraceae-unclassified-Otu0174 (log-FC -2.27, adjusted p-value  
239 0.0033), Lactobacillus-Out0053 (log-FC -3.85, adjusted p-value 1.09E-05), Oscillibacter  
240 (log-FC -2.49, adjusted p-value 0.0029) and Ruminococcaceae\_2 (log-FC -2.69, adjusted p-  
241 value 1.98E-05).

242 In Mali infants, (**Table S3**), there were 2-fold increased differences observed for  
243 rice bran fed infants in Lactobacillus-Out0356 (log-FC 3.2, adjusted p-value 1.35E-09) and  
244 decreased for Lachnospiraceae-unclassified-Otu0010 (log-FC -2.3, adjusted p-value 0.016).  
245 There were also distinctions among taxa between the infant gut microbiomes that was  
246 observed by age and country with respect to rice bran intake. At 12 months of age, the  
247 Nicaragua rice bran group had increased Paraprevotella (log-FC 6.2, adjusted p-value  
248 4.27E-08), Phascolarctobacterium (log-FC 6.12, adjusted p-value 1.60E-08) Veillonella  
249 (log-FC 3.35, adjusted p-value 3.30E-07) and Bifidobacterium (log-FC 2.6, adjusted p-  
250 value 1.44E-05). Lower abundant taxa in rice bran infants at 12 months from Nicaragua  
251 were Lachnospiraceae\_ND3007\_group (log-FC -2.0, adjusted p-value 0.00029) and  
252 Alisonella (log-FC -4.0, adjusted p-value 1.60E-08). Malian rice bran fed infants at 12  
253 months of age showed increased Lactobacillus\_Otu0053 (log-FC 2.7, adjusted p-value  
254 0.0098) and Alloprevotella (log-FC 3.6, adjusted p-value 0.00034). The significantly  
255 decreased fold difference in taxa of Malian infants between rice bran and control groups at  
256 12 months were Bifidobacteriaceae\_unclassified\_Otu0265 (log-FC -2.6, adjusted p-value  
257 3.95E-05) and Clostridium\_sensu\_stricto\_1\_Otu0076, and Terrisporobacter (log-FC -2.1,  
258 adjusted p-value 7.03E-06).

259           There were 12 OTUs identified as rice bran responsive from this microbial  
260 community analysis that showed changes in both Mali and Nicaragua at either 8 or 12  
261 months of age when compared to control. The highest area of overlap occurred for both  
262 Lactobacillaceae\_Lactobacillus\_Otu0024 and Lactobacillus\_Otu0053 (**Table S4**). Other  
263 taxa that overlapped between countries with respect to rice bran intake included three  
264 distinct Bifidobacterium, Faecalibacterium, and Lachnospiraceae.

265   **Metabolomics identified rice bran and microbial digested rice bran small molecules in**  
266 **stool of weaning infants**

267           A total of 309 stool samples were collected from this 6-month prospective study to  
268 evaluate effects of rice bran supplementation compared to control infants from Nicaragua  
269 and Mali. ANOVA contrasts and Welch's two-sample t-test were used to identify  
270 biochemicals that differed significantly between experimental groups at the 8-month time  
271 point. Stool metabolite analysis of children at 8 months of age in Nicaraguan and Malian  
272 infants resulted in the detection of 1449 biochemicals, of which 1016 metabolites had  
273 confirmed names and 433 compounds were of unknown structural identity (see **Table S5**).  
274 **Table 4** lists the fold differences calculated from the relative abundances of each stool  
275 metabolite between study diet groups at 8 months of age, whereby infants had been  
276 consuming rice bran daily for 2 months. There are 39 (Nicaragua) and 44 (Mali) stool  
277 metabolites with significant fold differences between children consuming rice bran  
278 compared to control. There were also 33 and 31 significantly different metabolites between  
279 groups that were classified as unknown for Nicaraguan and Malian infants respectively,  
280 (data shown in **Table S5**). Significant fold differences occurred for 15 amino acids, 2  
281 peptides, 3 carbohydrates, 9 lipids, 1 cofactor and vitamin, and 9 xenobiotics (six of these

282 considered as food components/plant-derived) in children consuming rice bran compared to  
283 control in Nicaragua. In Mali at 8 months of age, there were 6 amino acids, 1 energy, 14  
284 lipids, 6 cofactor and vitamins, 5 nucleotides and 12 xenobiotics (7 classified as food  
285 components/ plant-derived) that showed significant differences in children consuming rice  
286 bran compared to control (**Table 4**).

287         There were 62 stool metabolites from the Nicaraguan cohort at 8 months that  
288 showed significantly lower relative abundances (comparing fold differences between rice  
289 bran compared to control), and there were 10 significant stool metabolites with increased  
290 fold differences in abundance between groups. The stool metabolites of food and nutritional  
291 importance to highlight that resulted from increasing rice bran intake come from the  
292 tryptophan metabolism (indolepropionate), monoacylglycerol (1-linolenoylglycerol) and  
293 diacylglycerol metabolism (linoleoyl-linolenoyl-glycerol) pathways.

294         In contrast to Nicaragua, there were 54 distinct stool metabolites from the Mali  
295 cohort that had increased abundance and significant fold differences at 8 months between  
296 rice bran and control infants. Selected stool metabolites for gut health and nutrition  
297 relevance, as well as for originating from rice bran food metabolites, included Alpha-  
298 tocotrienol (vitamin E component), Pyridoxine (vitamin B6), Ferulic acid 4-sulfate, tyrosol,  
299 and N-acetyl sphingosine (**Table 4**). An estimated false discovery rate (q-value) was  
300 calculated to account for the multiple comparisons across metabolites that are typical of  
301 metabolomic-based studies.

302

303 **Discussion**

304           This study demonstrated that rice bran supplementation was feasible, well tolerated,  
305 and safe for weaning infants with strong compliance to daily dietary intake in both LMIC  
306 countries. Rice bran supplementation in the diet supported growth of Nicaraguan and  
307 Malian infants with differences detected between groups by 8 months of age and improved  
308 gut permeability at 12 months. Nicaraguan infants fed rice bran had increased LAZ  
309 compared to the control, and in Mali, there was increased WAZ. Based on documented  
310 country-wide averages using the WHO scoring index <sup>12</sup>, the 95 healthy infants enrolled in  
311 this study had slightly higher WAZ, LAZ and WLZ scores.

312           There is a growing body of scientific evidence for a strong relationship between  
313 EED and growth deficits in children <sup>7,10,47</sup>. EED biomarkers were selected in this study  
314 because high concentrations of stool AAT and MPO were associated with decreased growth  
315 in children <sup>47</sup>, and Naylor et al. found that elevated AAT levels were associated with  
316 decreased oral rotavirus vaccine response <sup>48</sup>. Rice bran was shown to reduce AAT in  
317 neonatal pigs challenged with human Rotavirus infection <sup>22</sup> and is of translational  
318 importance herein as rice bran intake improved AAT levels in Nicaraguan infants (**Table**  
319 **2**). The lack of significant differences in levels of EED biomarkers for Mali may be due to  
320 the higher number of overall diarrheal episodes, the level of variability within individuals,  
321 and breastfeeding over time and across groups, yet these findings did concur with  
322 concentrations reported in the MAL-ED cohort <sup>34</sup>. EED biomarkers merit continuous  
323 review for relevance with growth outcomes due to extensive global variability in  
324 concentrations reported across studies <sup>6,49-51</sup>.

325           A study limitation and possible confounder of rice bran modulation to infant gut  
326 measures was that the percentage of exclusively breastfed infants was lower and delivery

327 mode varied in the Nicaragua cohort (<50%) between groups, which was in contrast to the  
328 Mali site that had 100% of children that were breastfed and had vaginal delivery. These are  
329 key considerations to evaluating microbiomes of children with EED that have been  
330 characterized as less mature <sup>52</sup>, and with varied structure by geographical location <sup>53</sup>, diet  
331 deficiencies <sup>54-58</sup>, environmental exposures <sup>53,59,60</sup> and host factors <sup>59,61</sup>. Thus, we did expect  
332 changes in both the stool microbiome and metabolome that occurred over time with growth,  
333 and notably the microbial taxa and metabolites associated with the improved growth in rice  
334 bran groups also differed at 8 months in both countries.

335         Given that dietary rice bran intake has been previously shown to promote beneficial  
336 stool microbial communities, such as native gut probiotics in mice <sup>23,62</sup>, pigs <sup>21,22,29</sup> and  
337 adults <sup>25,63,64</sup>, we first evaluated significant genus level taxa differences between rice bran  
338 and control fed infants at 8 months and 12 months of age from both countries. In  
339 Nicaragua, *Lactobacillus*, *Lachnospiraceae*, *Bifidobacterium*, *Ruminococcaceae* and  
340 *Veillonella* were identified as responsive following rice bran consumption compared to an  
341 age and control matched group. These taxa have recognized saccharolytic mechanisms of  
342 action <sup>65-67</sup>, are known to produce and promote crossfeeding of short chain fatty acids <sup>68,69</sup>,  
343 as well as provide competitive inhibition of pathogen colonization <sup>70,71</sup>. The microbial  
344 enrichment of these communities as associated with infant growth outcomes has  
345 implications for assessing how gut microbes metabolize rice bran components. In Mali, the  
346 increased relative abundance of *Lactobacillus* in rice bran fed infants is also highly  
347 consistent with prior studies in young animals, and should be considered alongside  
348 evidence that human milk oligosaccharides also promote *Lactobacillus* in breastfed infants  
349 <sup>72</sup>.

350           Stool metabolites from infants fed rice bran showed significant fold differences  
351 amongst several essential amino acids, cofactors and vitamins, lipids, phytochemicals, and  
352 in energy metabolism pathways compared to the control groups. Stool metabolites  
353 originating from rice bran were identified in both Nicaragua and Malian infants, providing  
354 additional confirmation of compliance to the dietary intervention <sup>73</sup>. As predicted, we  
355 observed and reported exceptionally distinct profiles for both the stool microbiome and  
356 metabolome composition of infants between Mali and Nicaragua at all ages <sup>40,53,74</sup> and  
357 therefore separately discussed the response to rice bran supplementation by region. For  
358 example, the nearly 5-fold increased stool detection of indolepropionate in rice bran infants  
359 compared to control from Nicaragua represents a tryptophan metabolite produced by the  
360 gut microbiota that may influence the developing immune system and intestinal  
361 homeostasis <sup>75,76</sup>. Increased levels of N-acetylmethionine (nutritionally and metabolically  
362 equal to L-methionine) and N-formylmethionine in Malian infants also represented rice  
363 bran derived amino acids required for normal growth and development <sup>77</sup>. There are several  
364 cofactors and vitamins from rice bran supplementation, such as alpha and gamma-  
365 tocotrienol and pyridoxine (vitamin B6) that merit attention for demonstrating multiple  
366 health benefits such as synthesis of amino acids and neurotransmitter precursors, as well as  
367 preventing anemia and skin problems <sup>73,78,79</sup>. Additional microbial digested food  
368 components in the stool metabolome that come from rice bran were ferulic acid 4-sulfate,  
369 indoleacetylaspartate, and Tyrosol. A study limitation is that we had only supplemented for  
370 a 6 month window and according to WHO, growth assessment should be standardized and  
371 compared globally over the first two years of life <sup>80,81</sup>. We put forth that rice bran

372 metabolism by host and gut microbes between 12-36 months of age should be captured for  
373 the continuous assessment and influence on growth velocity during childhood <sup>80</sup>.

374 Furthermore, the increased separation noted between 8 and 12 months in this study  
375 showed modifications in gut microbial communities and metabolites by rice bran intake,  
376 and suggests there will be long-term impact on the overall microbiome composition as it  
377 continues to develop and mature <sup>82</sup>. The overall dietary pattern differences between mothers  
378 and infants weaning practices in each country were also considered a major source of  
379 variation as dietary diversity of gut microbe-food interactions were clearly observed in the  
380 stool metabolite profiling (see Table S5). Nevertheless, rice bran consumption was well  
381 tolerated at increasing dose supplementation amounts during the first 6 months of weaning  
382 without side effects or adverse interactions.

383 This was the first randomized controlled trial of rice bran supplementation in LMIC  
384 infants and provides compelling rationale for continued follow-up investigation of rice bran  
385 supplementation for reducing risk of malnutrition, as well as for eliciting changes during  
386 child growth that protect against enteric pathogens and diarrhea. The dose and feasibility  
387 outcomes from this study support development of rice bran based complementary weaning  
388 foods. Our findings also suggest that double blinded-controlled trial study designs with  
389 larger infant cohorts are warranted for long-term outcomes to be assessed until five years of  
390 age. Incorporating rice bran from local rice production and processing facilities should be a  
391 priority in subsequent trial designs, and with the goal of supporting the development of  
392 sustainable and affordable food products for weaning infants, particularly those residing in  
393 in LMIC where food and nutritional security remain.

394



## 395 **Materials and Methods**

### 396 **Study design**

397 A 6-month, prospective, randomized-controlled, dose escalation dietary intervention  
398 was conducted in a cohort of weaning infants residing in León, Nicaragua and in the  
399 community of Dioro, Mali, West Africa. Nicaraguan infants were recruited from public  
400 health rosters provided by the local Health Ministry from Perla Maria and Sutiava health  
401 sectors, and Malian infants were recruited from the Dioro Community Health Center. To be  
402 eligible, infants were screened between 4-5 months of age for health status, and then  
403 followed weekly for diarrhea episodes. Participants were excluded if they had experienced  
404 diarrhea or received antibiotic treatment within the previous month; had known allergies, or  
405 immune-compromising conditions (e.g. parasitic or malarial infections); had previously  
406 been hospitalized; and/or enrolled in a malnutrition treatment program. In Nicaragua, all  
407 eligible participants received 3 doses of the rotavirus vaccine per regular administration  
408 through the Immunization Program<sup>83</sup>. Rotavirus vaccination was not yet administered to  
409 the Mali cohort. All Malian participants received vitamin A supplementation upon  
410 enrollment. Dietary intervention with rice bran started when infants were 6 months of age  
411 because WHO guidelines promote exclusive breastfeeding for the first six months of life  
412 <sup>81,84</sup>.

413 The required ethical board reviews and approvals were completed for Mali and  
414 Nicaragua as provided by the Internal Review Board (IRB) of the Colorado State  
415 University Research Integrity and the Compliance Review office. In Mali, the Institut  
416 National de Recherche en Santé Publique (National Institute of Research in Public Health,  
417 FWA 00000892) approved the intervention, which occurred between October 2015 and

418 May of 2016 and registered at [clinicaltrials.gov](http://clinicaltrials.gov) as (NCT02557373) on 23 September 2015.  
419 Ethical review and approvals for the Nicaraguan intervention that occurred between March  
420 2015 and October 2015 were provided by the IRBs of the Universidad Nacional Autónoma  
421 de Nicaragua – León, University of North Carolina at Chapel Hill, and Virginia Polytechnic  
422 Institute and State University and registered at [clinicaltrials.gov](http://clinicaltrials.gov) on 26 November 2105 as  
423 (NCT02615886). Written informed consent was obtained from the infant’s parent or  
424 responsible guardian prior to any data collection. Infant participants that met the eligibility  
425 criteria were randomized within each health sector, and sex (Nicaragua) and geographic  
426 location of household and sex (Mali) to either rice bran or control group (see **Fig. S1** for  
427 enrollment details). Randomization was completed using sequential enrollment for each  
428 site independently. Participants were randomized by CSU, enrolled and assigned to groups  
429 by study coordinators in each country. Complete study protocol is available online  
430 ([http://csu-cvmb.colostate.edu/academics/erhs/Pages/elizabeth-ryan-lab-global-](http://csu-cvmb.colostate.edu/academics/erhs/Pages/elizabeth-ryan-lab-global-health.aspx)  
431 [health.aspx](http://csu-cvmb.colostate.edu/academics/erhs/Pages/elizabeth-ryan-lab-global-health.aspx)).

432

### 433 **Rice bran packaging for consumption**

434 The United States Department of Agriculture-Agricultural Research Service  
435 (USDA-ARS) Dale Bumpers National Rice Research Center provided rice bran that was  
436 polished from the U.S. variety, Calrose. Rice bran is prone to fat oxidation and heat-  
437 stabilization was performed to increase shelf-life by heating the bran at 100 degrees Celsius  
438 for five minutes to inactivate the lipase/lipoxygenase enzymes that cause rancidity<sup>85</sup>. The  
439 rice bran was sifted to remove any debris (rice husk, rice grain). Packaging of the rice bran  
440 was completed by Western Innovations, Inc. (Denver, CO) where 22 kg of rice bran was

441 weighed into 1g increments, separated into water-proof sachets, and heat-sealed to ensure  
442 the rice bran would be administered with accurate doses to infants.

443 Fourteen sachets (1g/sachet) were filled into a 4" x 3" x 2" box that was labeled for  
444 study participants and included nutrient information. These boxes were stored in a cool,  
445 dark, dry place until they were provided to study participants.

#### 446 **Nicaragua and Mali intervention**

447 The study team (doctor, nurse and study coordinator) in Nicaragua and the  
448 community health workers (CHWs) in Mali provided a 2-week supply of rice bran at each  
449 routine home visit and instructed the participant's parent or guardian to add the daily  
450 amount of rice bran to the participant's food. At 6-7 months of age, participants in the rice  
451 bran group consumed 1g of rice bran/day (1 sachet). Between the ages of 7-8 months,  
452 participants consumed 2g of rice bran/day (2 sachets). At 8-10 months of age, participants  
453 consumed 3g of rice bran/day (3 sachets). The amount increased to 4g of rice bran/day (4  
454 sachets) from 10-11 months, and 5g of rice bran/day (5 sachets) from 11-12 months of age,  
455 respectively. The rice bran was added to appropriate weaning foods, such as rice cereal,  
456 yogurt, fruit and natural juices, vegetables, and soups. At the beginning of the intervention  
457 (six months of age), infant's parents or guardians were instructed and monitored daily for  
458 one week by study personnel to ensure that guardians knew how to administer and record  
459 the amount of rice bran consumed. Compliance to the rice bran intervention was calculated  
460 from records that had the dose/amount of rice bran consumed circled in daily increments of  
461 none (0%), half (50%), or all (100%). The study team also collected any unused boxes or  
462 sachets during these visits. Participants in the control group did not receive any rice bran  
463 and there were no reports of brown rice intake during the 6-month study duration.

464 In Nicaragua, study personnel visited all infants weekly. In Mali, the CHWs visited  
465 each participant's household daily for the duration of the 6-month study to assess  
466 compliance and diarrhea episodes. If a participant had a diarrhea episode, the study team  
467 would collect a stool sample, and collect information that included the diarrhea onset date,  
468 how long the episode lasted, numbers of bowel movements within 24 hours, any associated  
469 signs and symptoms (e.g. nausea, vomiting, fever), if any other family members had  
470 diarrhea, and if any treatment was provided (e.g. antibiotics, rehydration).

471 The study team in Nicaragua collected data for control group participants at 6, 8,  
472 and 12 months old, and rice bran group every month. The anthropometric measures  
473 (weight and length) were collected via a portable stadiometer and weighing balance. Mali  
474 participants visited the Community Health Clinic every month. Length was measured in  
475 supine position using a reclining length-board. Length was collected to the nearest  
476 centimeter and weight to the nearest 0.1 kg. Anthropometric measures were calculated for  
477 LAZ, WAZ, and WLZ scores following the World Health Organizations (WHO) child  
478 growth standards using the WHO Anthro software (version 3.2.2) <sup>86</sup>.

479 Diapers were provided to all study participants. Stool was collected directly from  
480 soiled diapers. Freshly collected stool was diluted 20-fold and homogenized in a sterile  
481 pre-reduced anaerobic saline - 0.1 M potassium phosphate buffer (pH 7.2) containing 20%  
482 glycerol (vol/vol). Four aliquot suspensions were prepared in 15 mL falcon tubes,  
483 transported on dry ice to the UNAN-León-Center of Infectious Diseases Laboratories (and  
484 liquid nitrogen in Bamako ,Mali), immediately transferred to a -80°C freezer, shipped in a  
485 liquid nitrogen chilled dry shipping dewar to Colorado State University, where they were  
486 relocated into a -80°C freezer prior to analysis.

487 A study questionnaire was completed by the participant's caretaker (e.g. mother,  
488 father, or grandparent) to assess for duration of breastfeeding, types of and timing of  
489 introductions to complementary foods, as well as antibiotic use. The breastfeeding  
490 questions included whether or not the child was receiving breast milk, and/or had the child  
491 been receiving received formula. The complementary feeding history included a list of  
492 common Nicaraguan and Malian foods that are normally introduced to infants during  
493 weaning. Infant's parents or guardians recorded how often the infant consumed each of the  
494 eleven foods. The questionnaire also recorded if a participant had received treatment with  
495 antibiotics since the last visit, the reason for taking the antibiotic, the name of the antibiotic,  
496 as well as the length of time the participant had been taking the antibiotic. A household  
497 survey was also completed at the beginning of the trial to collect mother's education level,  
498 drinking water source, household flooring type, and animals present in the household.  
499 Analysis of breastfeeding and formula feeding patterns, complementary feeding practices,  
500 and associations with nutritional status at 6-months old (i.e. baseline) were previously  
501 reported for Nicaragua<sup>87</sup>. Monthly visits to the Mali community health clinic provided  
502 monitoring for malnutrition and severe adverse events; no adverse events were reported in  
503 the rice bran intervention group. There was one participant death reported in the control  
504 group (respiratory infection) and another withdrew to receive malnutrition treatment in the  
505 second month of the study. Diarrheal episodes were recorded, and a sample was collected  
506 in both countries using the same protocol.

#### 507 **Stool analysis for EED markers**

508 Stool biomarkers were selected to report gut inflammation and epithelial integrity as  
509 indicators of EED. These included neopterin (NEO), myeloperoxidase (MPO),

510 calprotectin, (CAL) and alpha-1 antitrypsin (AAT)<sup>88</sup>. Suspended stool samples from 6, 8,  
511 and 12-month collections were centrifuged at 3,000 RPM to remove debris, following  
512 agitation, and the remaining supernatant was used for Enzyme-Linked-Immunosorbant-  
513 Assay (ELISA) determination of EED biomarker concentrations. Laboratory analysis  
514 protocols included in commercial kits were followed. Concentrations of CAL were  
515 determined at a 1:360 final dilution factor (Eagle Biosciences- Nashua, NH. Ref: CAL35-  
516 K01). Samples were diluted to 1:100 for determination of NEO concentrations (GenWay  
517 Biotech Inc- San Diego, CA, USA). MPO concentrations were determined at a 1:500  
518 dilution factor (Immundiagnostik AG- Bensheim, Germany). Samples were diluted to  
519 1:12,500 for determination of AAT concentrations (Immuchrom GMBH- Heppenheim,  
520 Germany), and dilution factors accounted for stool suspension ratios (20-fold). Final  
521 concentrations were determined from averages of replicate assays and duplicate optical  
522 density readings, and interpolated using Graphpad 6.0 according to standards measured on  
523 each 96-well plate.

#### 524 **Stool microbiome analysis for Nicaragua and Mali**

525 The infant stool was collected at 6, 8 and 12 months of age from diapers and placed  
526 in a 1:19 ratio with Phosphate Buffered Saline + Glycerol solution. Diarrhea samples were  
527 collected using the same protocol. Suspended stool samples were vortexed before  
528 centrifuging at 3000 RPM to separate the stool debris. The remaining supernatant was used  
529 for Enzyme-Linked-Immunosorbant-Assay (ELISA) determination of EED biomarkers  
530 whereas; DNA was extracted for 16S microbial analysis from the stool pellet. DNA  
531 extraction was conducted using MoBio PowerSoil Kit (Reference number 12888, MoBio  
532 Laboratories Inc., Solana Beach, CA). PCR amplification of 390 bp amplicons was done in

533 50  $\mu$ l reaction using Fischer Hot Start Master Mix and EMP standard protocols <sup>42-46</sup>. SPRI  
534 magnetic beads were used to purify DNA, and fluorimetric quantification of Sybr Green  
535 tags was used to confirm adequate concentration of DNA. The pooled library was created  
536 with 50 ng DNA per sample and quantified using Kapa Kit (Kapa Biosystems). The pooled  
537 library was run on Illumina-MiSeq with 15% PhiX mock library to reduce discrepancies in  
538 read clustering, using the Illumina V2 500 cycle kit (2 x 250/250 paired-end reads).

### 539 **Microbiome data processing and analysis**

540 Sequence data were processed using mothur <sup>89</sup> version 1.39.5 and using a custom  
541 pipeline that provides an adjustment on the developers' standard operating procedure (SOP)  
542 for OTU calling and taxonomic classification of MiSeq data first presented in Kozich, et  
543 al., 2013 <sup>90</sup>. For alignment and classification within this SOP we used the SILVA database  
544 <sup>91</sup> version 128. Clustering, for OTU identification, was performed using VSEARCH using  
545 the distance based greedy clustering (DGC) option as implanted in mothur and utilizing  
546 0.97 sequence similarity cutoff. We also used a cutoff of one read that was subtracted from  
547 all OTU read counts to guard against overestimation of sample richness. Rarefaction curves  
548 were generated using the package vegan <sup>92</sup> as implemented in R version 3.4.4 <sup>93</sup> to assess  
549 diversity and suitability of depth of coverage per sample. The resulting OTU table was  
550 utilized in further data analyses as follows.

551 Exploring the data: Bar-graphs for relative abundance data based on the resulting  
552 OTU table were generated using the ggplot2 <sup>94</sup> package in R. These plots were generated  
553 for the data at the genus and the family levels and meant to describe the microbial  
554 community structure per sampled infant and per time point under each of the treatment  
555 levels.

556

557           Data were normalized using cumulative sum scaling (CSS)<sup>95</sup> prior to beta diversity  
558 and log-fold change analyses. Nonmetric Multidimensional Scaling (NMDS)<sup>96</sup> was used on  
559 the OTU level to assess possible trends and clustering in the microbial community structure  
560 comparing the two countries, the treatment conditions and the two time points, using the  
561 vegan package and utilizing Bray-Curtis dissimilarity<sup>96</sup>. Data were separated per country  
562 and the metagenomeSeq<sup>97</sup> package in R<sup>93</sup> was used to fit a zero inflated normal (ZIN)  
563 model to test for log-fold change differences between the rice bran treatment and control  
564 per age group. Benjamini and Hochberg's<sup>98</sup> false discovery rate (FDR) method was used to  
565 correct for multiple testing and compute the adjusted p-values used to determine  
566 significance of differences in the log-fold change of OTU abundance .

567

### 568 **Stool metabolomics analysis**

569           Stool samples were sent to Metabolon Inc. (Durham, NC, USA) for non-targeted  
570 metabolite profiling via ultrahigh-performance liquid chromatography tandem mass  
571 spectrometry (UPLC-MS/MS). All samples were accessioned into the Metabolon Library  
572 Information Management Systems (LIMS) and prepared using the automated MicroLab  
573 Star® system (Hamilton Company, Switzerland). Eight to ten recovery standards were  
574 added prior to the first step in the extraction process for quality control purposes. Extraction  
575 was performed using 80% ice-cold methanol under vigorous shaking for 2 min (Glen Mills  
576 GenoGrinder 2000) followed by centrifugation to remove protein, dissociate small  
577 molecules bound to protein or trapped in the precipitated protein matrix. Each stool extract  
578 was divided into five fractions: two for analysis by two separate reverse phase UPLC-



579 MS/MS methods with positive ion mode electrospray ionization, 1 for analysis by reverse  
580 phase UPLC-MS/MS methods with negative ion mode electrospray ionization, 1 for  
581 hydrophilic interaction liquid chromatography UPLC-MS/MS with negative ion mode  
582 electrospray ionization, and 1 sample for backup. All samples were placed briefly on  
583 Concentration Evaporator (TurboVap® Zymark) to remove organic solvent. UPLC-  
584 MS/MS methods utilized a Waters ACQUITY ultra-performance liquid chromatography  
585 and a Thermo Scientific Q-Exactive high resolution/accurate mass spectrometer interfaced  
586 with a heated electrospray ionization (HESI-II) source and Orbitrap mass analyzer operated  
587 at 35,000 mass resolution. Raw data was extracted, peak-identified and processed for  
588 quality control using Metabolon's hardware and software.

#### 589 **Statistical analysis**

590 Statistical analyses for anthropometric measures (length, weight, LAZ, WAZ, and WLZ)  
591 and stool EED biomarkers were completed using SAS 9.4 (Cary, NC, USA). The sample  
592 size was calculated for achieving greater than 85% power and based on expected changes in  
593 selected stool metabolites following dietary rice bran consumption for one month<sup>25</sup>.  
594 Normality was evaluated by visual inspection. For anthropometric variables, two-sample t-  
595 tests were used to compare means for the 2 treatment groups (rice bran and control)  
596 separately at birth and 6 months (prior to start of treatment). A repeated measures analysis  
597 was performed for each response variable separately using SAS Proc Mixed. Specifically,  
598 treatment (rice bran or control) and age (6, 8 or 12 months), and treatment-age interaction  
599 were included in the model as fixed effects. The participant was included as a random  
600 effect to account for repeated measures. At each age, treatment groups were compared  
601 using contrasts of the model. A similar repeated measures analysis was used EED

602 biomarkers, but log transformation was used to satisfy model assumptions. For stool  
603 metabolites, Welch's two-sample t-test was used to analyze statistical significance between  
604 groups' stool metabolites, after participating in the 6-month dietary trial. A p-value of  
605  $\leq 0.05$  was used for statistical significance. An estimated false discovery rate (q-value) was  
606 calculated to account for the multiple comparisons across metabolites that are typical of  
607 metabolomic-based studies.

608

### 609 **References and Notes:**

- 610 1 WHO. *Diarrhoeal disease*, <<http://www.who.int/mediacentre/factsheets/fs330/en/>>  
611 (2017).
- 612 2 Black, R. E. *et al.* Maternal and child undernutrition: global and regional exposures  
613 and health consequences. *Lancet* **371**, 243-260, doi:10.1016/S0140-6736(07)61690-  
614 0 (2008).
- 615 3 Bhutta, Z. A. & Salam, R. A. Global nutrition epidemiology and trends. *Ann Nutr*  
616 *Metab* **61 Suppl 1**, 19-27, doi:10.1159/000345167 (2012).
- 617 4 Joseph, S. A. *et al.* Risk Factors Associated with Malnutrition in One-Year-Old  
618 Children Living in the Peruvian Amazon. *PLOS Neglected Tropical Diseases* **8**,  
619 e3369, doi:10.1371/journal.pntd.0003369 (2014).
- 620 5 Keusch, G. T. *et al.* Implications of acquired environmental enteric dysfunction for  
621 growth and stunting in infants and children living in low- and middle-income  
622 countries. *Food Nutr Bull* **34**, 357-364, doi:10.1177/156482651303400308 (2013).
- 623 6 Keusch, G. T. *et al.* Environmental Enteric Dysfunction: Pathogenesis, Diagnosis,  
624 and Clinical Consequences. *Clinical Infectious Diseases: An Official Publication of*

- 625            *the Infectious Diseases Society of America* **59**, S207-S212, doi:10.1093/cid/ciu485  
626            (2014).
- 627    7        Syed S, A. A., and Duggan C. Environmental Enteric Dysfunction in Children: A  
628            Review. *J Pediatr Gastroenterol Nutr* **63**, 9 (2016).
- 629    8        Lunn P G, N.-C. C. A., Downes R M. Intestinal permeability, mucosal injury, and  
630            growth faltering in Gambian infants. *The Lancet* **338**, 4 (1991).
- 631    9        Campbell D I, E. M. a. L. P. G. Growth Faltering in Rural Gambian Infants Is  
632            Associated with Impaired Small Intestinal Barrier Function, Leading to  
633            Endotoxemia and Systemic Inflammation. *J. Nutr.* **133**, 7 (2003).
- 634    10       Kosek, M. *et al.* Fecal markers of intestinal inflammation and permeability  
635            associated with the subsequent acquisition of linear growth deficits in infants. *The*  
636            *American journal of tropical medicine and hygiene* **88**, 390-396,  
637            doi:10.4269/ajtmh.2012.12-0549 (2013).
- 638    11       Korpe, P. S. & Petri, W. A., Jr. Environmental enteropathy: critical implications of  
639            a poorly understood condition. *Trends Mol Med* **18**, 328-336,  
640            doi:10.1016/j.molmed.2012.04.007 (2012).
- 641    12       Victora, C. G., de Onis, M., Hallal, P. C., Blossner, M. & Shrimpton, R. Worldwide  
642            timing of growth faltering: revisiting implications for interventions. *Pediatrics* **125**,  
643            e473-480, doi:10.1542/peds.2009-1519 (2010).
- 644    13       Caulfield E L, H. L. S., and Piwoz G E. Interventions to improve intake of  
645            complementary foods by infants 6 to 12 months of age in developing countries:  
646            Impact on growth and on the prevalence of malnutrition and potential contribution  
647            to child survival. *Food and Nutrition Bulletin* **20**, 18 (1999).

- 648 14 Dewey, K. G., Cohen, R. J., Brown, K. H. & Rivera, L. L. Age of introduction of  
649 complementary foods and growth of term, low-birth-weight, breast-fed infants: a  
650 randomized intervention study in Honduras. *Am J Clin Nutr* **69**, 679-686 (1999).
- 651 15 Smith, H. E. *et al.* Multiple micronutrient supplementation transiently ameliorates  
652 environmental enteropathy in Malawian children aged 12-35 months in a  
653 randomized controlled clinical trial. *J Nutr* **144**, 2059-2065,  
654 doi:10.3945/jn.114.201673 (2014).
- 655 16 Wang, A. Z. *et al.* A Combined Intervention of Zinc, Multiple Micronutrients, and  
656 Albendazole Does Not Ameliorate Environmental Enteric Dysfunction or Stunting  
657 in Rural Malawian Children in a Double-Blind Randomized Controlled Trial. *J Nutr*  
658 **147**, 97-103, doi:10.3945/jn.116.237735 (2017).
- 659 17 Madhi, S. A. *et al.* Effect of human rotavirus vaccine on severe diarrhea in African  
660 infants. *The New England journal of medicine* **362**, 289-298,  
661 doi:10.1056/NEJMoa0904797 (2010).
- 662 18 Jones, K. D., Thitiri, J., Ngari, M. & Berkley, J. A. Childhood malnutrition: toward  
663 an understanding of infections, inflammation, and antimicrobials. *Food Nutr Bull*  
664 **35**, S64-70, doi:10.1177/15648265140352S110 (2014).
- 665 19 Keenan, J. D. *et al.* Azithromycin to Reduce Childhood Mortality in Sub-Saharan  
666 Africa. *New England Journal of Medicine* **378**, 1583-1592,  
667 doi:10.1056/NEJMoa1715474 (2018).
- 668 20 Pickering, A. J., Djebbari, H., Lopez, C., Coulibaly, M. & Alzua, M. L. Effect of a  
669 community-led sanitation intervention on child diarrhoea and child growth in rural

- 670 Mali: a cluster-randomised controlled trial. *Lancet Glob Health* **3**, e701-711,  
671 doi:10.1016/S2214-109X(15)00144-8 (2015).
- 672 21 Lei, S. *et al.* High Protective Efficacy of Probiotics and Rice Bran against Human  
673 Norovirus Infection and Diarrhea in Gnotobiotic Pigs. *Frontiers in microbiology* **7**,  
674 1699, doi:10.3389/fmicb.2016.01699 (2016).
- 675 22 Yang, X. *et al.* High protective efficacy of rice bran against human rotavirus  
676 diarrhea via enhancing probiotic growth, gut barrier function, and innate immunity.  
677 *Scientific reports* **5**, 15004, doi:10.1038/srep15004 (2015).
- 678 23 Kumar, A. *et al.* Dietary rice bran promotes resistance to *Salmonella enterica*  
679 serovar Typhimurium colonization in mice. *BMC microbiology* **12**, 71,  
680 doi:10.1186/1471-2180-12-71 (2012).
- 681 24 Goodyear, A. *et al.* Dietary rice bran supplementation prevents *Salmonella*  
682 colonization differentially across varieties and by priming intestinal immunity.  
683 *Journal of Functional Foods* **18**, 653-664,  
684 doi:<https://doi.org/10.1016/j.jff.2015.08.027> (2015).
- 685 25 Sheflin, A. M. *et al.* Pilot dietary intervention with heat-stabilized rice bran  
686 modulates stool microbiota and metabolites in healthy adults. *Nutrients* **7**, 1282-  
687 1300, doi:10.3390/nu7021282 (2015).
- 688 26 Zarei, I., Brown, D. G., Nealon, N. J. & Ryan, E. P. Rice Bran Metabolome  
689 Contains Amino Acids, Vitamins & Cofactors, and Phytochemicals with Medicinal  
690 and Nutritional Properties. *Rice* **10**, 24, doi:10.1186/s12284-017-0157-2 (2017).
- 691 27 Twitchell, E. L. *et al.* Modeling human enteric dysbiosis and rotavirus immunity in  
692 gnotobiotic pigs. *Gut pathogens* **8**, 51, doi:10.1186/s13099-016-0136-y (2016).

- 693 28 Yang, X. *et al.* Dietary rice bran protects against rotavirus diarrhea and promotes  
694 Th1-type immune responses to human rotavirus vaccine in gnotobiotic pigs.  
695 *Clinical and vaccine immunology : CVI* **21**, 1396-1403, doi:10.1128/cvi.00210-14  
696 (2014).
- 697 29 Nealon, N. J., Yuan, L., Yang, X. & Ryan, E. P. Rice Bran and Probiotics Alter the  
698 Porcine Large Intestine and Serum Metabolomes for Protection against Human  
699 Rotavirus Diarrhea. *Frontiers in microbiology* **8**, 653,  
700 doi:10.3389/fmicb.2017.00653 (2017).
- 701 30 Muthayya, S., Sugimoto, J. D., Montgomery, S. & Maberly, G. F. An overview of  
702 global rice production, supply, trade, and consumption. *Annals of the New York  
703 Academy of Sciences* **1324**, 7-14, doi:doi:10.1111/nyas.12540 (2014).
- 704 31 Bokulich, N. A. *et al.* Antibiotics, birth mode, and diet shape microbiome  
705 maturation during early life. *Science translational medicine* **8**, 343ra382-343ra382,  
706 doi:10.1126/scitranslmed.aad7121 (2016).
- 707 32 Ordiz, M. I. *et al.* Environmental Enteric Dysfunction and the Fecal Microbiota in  
708 Malawian Children. *The American journal of tropical medicine and hygiene* **96**,  
709 473-476, doi:10.4269/ajtmh.16-0617 (2017).
- 710 33 Semba, R. D. *et al.* Environmental Enteric Dysfunction is Associated with Carnitine  
711 Deficiency and Altered Fatty Acid Oxidation. *EBioMedicine* **17**, 57-66,  
712 doi:<https://doi.org/10.1016/j.ebiom.2017.01.026> (2017).
- 713 34 McCormick, B. J. *et al.* Dynamics and Trends in Fecal Biomarkers of Gut Function  
714 in Children from 1-24 Months in the MAL-ED Study. *The American journal of  
715 tropical medicine and hygiene* **96**, 465-472, doi:10.4269/ajtmh.16-0496 (2017).

- 716 35 Becker-Dreps, S. *et al.* The Association Between Fecal Biomarkers of  
717 Environmental Enteropathy and Rotavirus Vaccine Response in Nicaraguan Infants.  
718 *The Pediatric infectious disease journal* **36**, 412-416,  
719 doi:10.1097/INF.0000000000001457 (2017).
- 720 36 Campbell, D. I., McPhail, G., Lunn, P. G., Elia, M. & Jeffries, D. J. Intestinal  
721 inflammation measured by fecal neopterin in Gambian children with enteropathy:  
722 association with growth failure, *Giardia lamblia*, and intestinal permeability. *J*  
723 *Pediatr Gastroenterol Nutr* **39**, 153-157 (2004).
- 724 37 Yatsunenko, T. *et al.* Human gut microbiome viewed across age and geography.  
725 *Nature* **486**, 222-227, doi:10.1038/nature11053 (2012).
- 726 38 Koenig, J. E. *et al.* Succession of microbial consortia in the developing infant gut  
727 microbiome. *Proceedings of the National Academy of Sciences of the United States*  
728 *of America* **108 Suppl 1**, 4578-4585, doi:10.1073/pnas.1000081107 (2011).
- 729 39 Dominguez-Bello, M. G. *et al.* Delivery mode shapes the acquisition and structure  
730 of the initial microbiota across multiple body habitats in newborns. *Proceedings of*  
731 *the National Academy of Sciences of the United States of America* **107**, 11971-  
732 11975, doi:10.1073/pnas.1002601107 (2010).
- 733 40 Backhed, F. *et al.* Dynamics and Stabilization of the Human Gut Microbiome  
734 during the First Year of Life. *Cell host & microbe* **17**, 852,  
735 doi:10.1016/j.chom.2015.05.012 (2015).
- 736 41 Subramanian, S. *et al.* Persistent gut microbiota immaturity in malnourished  
737 Bangladeshi children. *Nature* **510**, 417-421, doi:10.1038/nature13421 (2014).

- 738 42 Apprill, A., McNally, S., Parsons, R. & Weber, L. *Minor revision to V4 region SSU*  
739 *rRNA 806R gene primer greatly increases detection of SAR11 bacterioplankton.*  
740 Vol. 75 (2015).
- 741 43 Caporaso, J. G. *et al.* Ultra-high-throughput microbial community analysis on the  
742 Illumina HiSeq and MiSeq platforms. *The ISME journal* **6**, 1621,  
743 doi:10.1038/ismej.2012.8  
744 <https://www.nature.com/articles/ismej20128#supplementary-information> (2012).
- 745 44 Caporaso, J. G. *et al.* Global patterns of 16S rRNA diversity at a depth of millions  
746 of sequences per sample. *Proceedings of the National Academy of Sciences* **108**,  
747 4516-4522, doi:10.1073/pnas.1000080107 (2011).
- 748 45 Parada, A. E., Needham, D. M. & Fuhrman, J. A. Every base matters: assessing  
749 small subunit rRNA primers for marine microbiomes with mock communities, time  
750 series and global field samples. *Environmental Microbiology* **18**, 1403-1414,  
751 doi:doi:10.1111/1462-2920.13023 (2016).
- 752 46 Walters, W. *et al.* Improved Bacterial 16S rRNA Gene (V4 and V4-5) and Fungal  
753 Internal Transcribed Spacer Marker Gene Primers for Microbial Community  
754 Surveys. *mSystems* **1**, doi:10.1128/mSystems.00009-15 (2016).
- 755 47 Richard L. Guerrant , A. M. L., Relana Pinkerton, Pedro H. Q. S. Medeiros, Paloma  
756 A. Cavalcante, Mark DeBoer, Margaret Kosek, Christopher Duggan, Andrew  
757 Gewirtz, Jonathan C. Kagan, Anna E. Gauthier, Jonathan Swann, Jordi Mayneris-  
758 Perxachs, David T. Bolick, Elizabeth A. Maier, Marjorie M. Guedes, Sean R.  
759 Moore, William A. Petri, Alexandre Havt, Ila F. Lima, Mara de Moura Gondim  
760 Prata, Josyf C. Michaleckyj, Rebecca J. Scharf, Craig Sturgeon, Alessio Fasano,



- 761 Aldo A. M. Lima. Biomarkers of Environmental Enteropathy,  
762 Inflammation, Stunting, and Impaired Growth in Children in Northeast Brazil.  
763 *journal.pone* **11**, 20 (2016).
- 764 48 Naylor, C. *et al.* Environmental Enteropathy, Oral Vaccine Failure and Growth  
765 Faltering in Infants in Bangladesh. *EBioMedicine* **2**, 1759-1766,  
766 doi:10.1016/j.ebiom.2015.09.036 (2015).
- 767 49 Harper, K. M., Mutasa, M., Prendergast, A. J., Humphrey, J. & Manges, A. R.  
768 Environmental enteric dysfunction pathways and child stunting: A systematic  
769 review. *PLOS Neglected Tropical Diseases* **12**, e0006205,  
770 doi:10.1371/journal.pntd.0006205 (2018).
- 771 50 Yu, J. *et al.* Environmental Enteric Dysfunction Includes a Broad Spectrum of  
772 Inflammatory Responses and Epithelial Repair Processes. *Cell Mol Gastroenterol*  
773 *Hepatol* **2**, 158-174 e151, doi:10.1016/j.jcmgh.2015.12.002 (2016).
- 774 51 Petri, W. A., Jr., Naylor, C. & Haque, R. Environmental enteropathy and  
775 malnutrition: do we know enough to intervene? *BMC Med* **12**, 187,  
776 doi:10.1186/s12916-014-0187-1 (2014).
- 777 52 Brown, E. M. *et al.* Diet and specific microbial exposure trigger features of  
778 environmental enteropathy in a novel murine model. *Nature communications* **6**,  
779 7806, doi:10.1038/ncomms8806 (2015).
- 780 53 Ayeni, F. A. *et al.* Infant and Adult Gut Microbiome and Metabolome in Rural  
781 Bassa and Urban Settlers from Nigeria. *Cell reports* **23**, 3056-3067,  
782 doi:10.1016/j.celrep.2018.05.018 (2018).

- 783 54 Mayneris-Perxachs, J. *et al.* Protein- and zinc-deficient diets modulate the murine  
784 microbiome and metabolic phenotype. *Am J Clin Nutr* **104**, 1253-1262,  
785 doi:10.3945/ajcn.116.131797 (2016).
- 786 55 Ma, N., Tian, Y., Wu, Y. & Ma, X. Contributions of the Interaction Between  
787 Dietary Protein and Gut Microbiota to Intestinal Health. *Current protein & peptide*  
788 *science* **18**, 795-808, doi:10.2174/1389203718666170216153505 (2017).
- 789 56 Lin, H., An, Y., Hao, F., Wang, Y. & Tang, H. Correlations of Fecal Metabonomic  
790 and Microbiomic Changes Induced by High-fat Diet in the Pre-Obesity State.  
791 *Scientific reports* **6**, 21618, doi:10.1038/srep21618 (2016).
- 792 57 Parra-Llorca, A. *et al.* Preterm Gut Microbiome Depending on Feeding Type:  
793 Significance of Donor Human Milk. *Frontiers in microbiology* **9**, 1376,  
794 doi:10.3389/fmicb.2018.01376 (2018).
- 795 58 Kau, A. L., Ahern, P. P., Griffin, N. W., Goodman, A. L. & Gordon, J. I. Human  
796 nutrition, the gut microbiome and the immune system. *Nature* **474**, 327-336,  
797 doi:10.1038/nature10213 (2011).
- 798 59 Velly, H., Britton, R. A. & Preidis, G. A. Mechanisms of cross-talk between the  
799 diet, the intestinal microbiome, and the undernourished host. *Gut microbes* **8**, 98-  
800 112, doi:10.1080/19490976.2016.1267888 (2017).
- 801 60 Merrifield, C. A. *et al.* Neonatal environment exerts a sustained influence on the  
802 development of the intestinal microbiota and metabolic phenotype. *The ISME*  
803 *journal* **10**, 145-157, doi:10.1038/ismej.2015.90 (2016).

- 804 61 Blekhman, R. *et al.* Host genetic variation impacts microbiome composition across  
805 human body sites. *Genome biology* **16**, 191, doi:10.1186/s13059-015-0759-1  
806 (2015).
- 807 62 Henderson, A. J., Kumar, A., Barnett, B., Dow, S. W. & Ryan, E. P. Consumption  
808 of rice bran increases mucosal immunoglobulin A concentrations and numbers of  
809 intestinal *Lactobacillus* spp. *Journal of medicinal food* **15**, 469-475,  
810 doi:10.1089/jmf.2011.0213 (2012).
- 811 63 Brown, D. G., Borresen, E. C., Brown, R. J. & Ryan, E. P. Heat-stabilised rice bran  
812 consumption by colorectal cancer survivors modulates stool metabolite profiles and  
813 metabolic networks: a randomised controlled trial. *British Journal of Nutrition* **117**,  
814 1244-1256, doi:10.1017/S0007114517001106 (2017).
- 815 64 So, W. K. W., Law, B. M. H., Law, P. T. W., Chan, C. W. H. & Chair, S. Y.  
816 Current Hypothesis for the Relationship between Dietary Rice Bran Intake, the  
817 Intestinal Microbiota and Colorectal Cancer Prevention. *Nutrients* **8**, 569,  
818 doi:10.3390/nu8090569 (2016).
- 819 65 Hamer, H. M., Preter, V. D., Windey, K. & Verbeke, K. Functional analysis of  
820 colonic bacterial metabolism: relevant to health? *American Journal of Physiology-*  
821 *Gastrointestinal and Liver Physiology* **302**, G1-G9, doi:10.1152/ajpgi.00048.2011  
822 (2012).
- 823 66 Newton, D. F., Macfarlane, S. & Macfarlane, G. T. Effects of Antibiotics on  
824 Bacterial Species Composition and Metabolic Activities in Chemostats Containing  
825 Defined Populations of Human Gut Microorganisms. *Antimicrobial Agents and*  
826 *Chemotherapy* **57**, 2016-2025, doi:10.1128/aac.00079-13 (2013).

- 827 67 Pessione, E. Lactic acid bacteria contribution to gut microbiota complexity: lights  
828 and shadows. *Frontiers in Cellular and Infection Microbiology* **2**,  
829 doi:10.3389/fcimb.2012.00086 (2012).
- 830 68 Leone, V. *et al.* Effects of Diurnal Variation of Gut Microbes and High-Fat Feeding  
831 on Host Circadian Clock Function and Metabolism. *Cell host & microbe* **17**, 681-  
832 689, doi:<https://doi.org/10.1016/j.chom.2015.03.006> (2015).
- 833 69 Tahara, Y. *et al.* Gut Microbiota-Derived Short Chain Fatty Acids Induce Circadian  
834 Clock Entrainment in Mouse Peripheral Tissue. *Scientific Reports* **8**, 1395,  
835 doi:10.1038/s41598-018-19836-7 (2018).
- 836 70 Pickard, J. M., Zeng, M. Y., Caruso, R. & Núñez, G. Gut microbiota: Role in  
837 pathogen colonization, immune responses, and inflammatory disease.  
838 *Immunological Reviews* **279**, 70-89, doi:doi:10.1111/imr.12567 (2017).
- 839 71 Ubeda, C., Djukovic, A. & Isaac, S. Roles of the intestinal microbiota in pathogen  
840 protection. *Clinical & Translational Immunology* **6**, e128,  
841 doi:doi:10.1038/cti.2017.2 (2017).
- 842 72 Davis, J. C. C. *et al.* Growth and Morbidity of Gambian Infants are Influenced by  
843 Maternal Milk Oligosaccharides and Infant Gut Microbiota. *Scientific Reports* **7**,  
844 40466, doi:10.1038/srep40466  
845 <https://www.nature.com/articles/srep40466#supplementary-information> (2017).
- 846 73 Li, K. J., Borresen, E. C., Jenkins-Puccetti, N., Luckasen, G. & Ryan, E. P. Navy  
847 Bean and Rice Bran Intake Alters the Plasma Metabolome of Children at Risk for  
848 Cardiovascular Disease. *Frontiers in Nutrition* **4**, doi:10.3389/fnut.2017.00071  
849 (2018).

- 850 74 Gupta, V. K., Paul, S. & Dutta, C. Geography, Ethnicity or Subsistence-Specific  
851 Variations in Human Microbiome Composition and Diversity. *Frontiers in*  
852 *microbiology* **8**, doi:10.3389/fmicb.2017.01162 (2017).
- 853 75 Alexeev, E. E. *et al.* Microbiota-Derived Indole Metabolites Promote Human and  
854 Murine Intestinal Homeostasis through Regulation of Interleukin-10 Receptor. *The*  
855 *American journal of pathology* **188**, 1183-1194, doi:10.1016/j.ajpath.2018.01.011  
856 (2018).
- 857 76 Gao, J. *et al.* Impact of the Gut Microbiota on Intestinal Immunity Mediated by  
858 Tryptophan Metabolism. *Front Cell Infect Microbiol* **8**, 13,  
859 doi:10.3389/fcimb.2018.00013 (2018).
- 860 77 McBreaarty, L. E. & Bertolo, R. F. The dynamics of methionine supply and demand  
861 during early development. *Applied Physiology, Nutrition & Metabolism* **41**, 581-  
862 587, doi:10.1139/apnm-2015-0577 (2016).
- 863 78 Baj, T. & Sieniawska, E. in *Pharmacognosy* (eds Simone Badal & Rupika  
864 Delgoda) 281-292 (Academic Press, 2017).
- 865 79 Borresen, E. C. *et al.* A Pilot Randomized Controlled Clinical Trial to Assess  
866 Tolerance and Efficacy of Navy Bean and Rice Bran Supplementation for Lowering  
867 Cholesterol in Children. *Glob Pediatr Health* **4**, 2333794X17694231,  
868 doi:10.1177/2333794X17694231 (2017).
- 869 80 WHO. Training course on child growth assessment. (WHO, Geneva, 2008).
- 870 81 MINSA. (2012).

- 871 82 Putignani, L. *et al.* Gut Microbiota Dysbiosis as Risk and Premorbid Factors of IBD  
872 and IBS Along the Childhood-Adulthood Transition. *Inflammatory bowel diseases*  
873 **22**, 487-504, doi:10.1097/mib.0000000000000602 (2016).
- 874 83 MINSA. *Normativa 121* (ed Programa Ampliado de Inmunizaciones) 246  
875 (Managua, Nicaragua, 2013).
- 876 84 WHO. Global Database on Child Growth and Malnutrition. 74 (WHO, Geneva,  
877 1997).
- 878 85 Lakkakula, N. R., Lima, M. & Walker, T. Rice bran stabilization and rice bran oil  
879 extraction using ohmic heating. *Bioresource Technology* **92**, 157-161,  
880 doi:<http://dx.doi.org/10.1016/j.biortech.2003.08.010> (2004).
- 881 86 WHO Anthro and macros v. version 3.2.2 (2011).
- 882 87 Borresen EC, G. M., Zambrana LE, Perez J, Perez C, Stallones L, Becker-Dreps S,  
883 Yuan L, Vilchez S, Ryan EP. . Association between Infant Feeding Practices and  
884 Nutritional Status in Healthy Nicaraguan Infants. *J Food Nutri Diete* **1**, 6,  
885 doi:14000110 (2016).
- 886 88 George, C. M. *et al.* Geophagy is associated with environmental enteropathy and  
887 stunting in children in rural Bangladesh. *The American journal of tropical medicine*  
888 *and hygiene* **92**, 1117-1124, doi:10.4269/ajtmh.14-0672 (2015).
- 889 89 Schloss, P. D. *et al.* Introducing mothur: open-source, platform-independent,  
890 community-supported software for describing and comparing microbial  
891 communities. *Applied and environmental microbiology* **75**, 7537-7541,  
892 doi:10.1128/aem.01541-09 (2009).

- 893 90 Kozich, J. J., Westcott, S. L., Baxter, N. T., Highlander, S. K. & Schloss, P. D.  
894 Development of a dual-index sequencing strategy and curation pipeline for  
895 analyzing amplicon sequence data on the MiSeq Illumina sequencing platform.  
896 *Applied and environmental microbiology* **79**, 5112-5120, doi:10.1128/aem.01043-  
897 13 (2013).
- 898 91 Quast, C. *et al.* The SILVA ribosomal RNA gene database project: improved data  
899 processing and web-based tools. *Nucleic acids research* **41**, D590-596,  
900 doi:10.1093/nar/gks1219 (2013).
- 901 92 Oksanen J , B. F. G., Kindt R , Legendre P , Minchin P R , O'Hara R B , Simpson G  
902 L , Solymos P , Stevens M H H , Wagner H. vegan: Community Ecology Package.  
903 (2014).
- 904 93 R Core Team. R: A language and environment for statistical computing. (2017).
- 905 94 Wickham, H. ggplot2: Elegant graphics for data analysis. *Springer*  
906 *Science+Business Media* (2009).
- 907 95 Paulson, J. N., Stine, O. C., Bravo, H. C. & Pop, M. Differential abundance analysis  
908 for microbial marker-gene surveys. *Nature methods* **10**, 1200,  
909 doi:10.1038/nmeth.2658  
910 <https://www.nature.com/articles/nmeth.2658#supplementary-information> (2013).
- 911 96 Legendre, P. L., L., . Numerical Ecology. *Elsevier B.V* **20** (1998).
- 912 97 Paulson, J. N. metagenomeSeq: Statistical analysis for sparse high-throughput  
913 sequencing. Bioconductor , . *Package 1* (2014).

914 98 Benjamini, Y. & Hochberg, Y. Controlling the False Discovery Rate: A Practical  
915 and Powerful Approach to Multiple Testing. *Journal of the Royal Statistical*  
916 *Society. Series B (Methodological)* **57**, 289-300 (1995).

917

## 918 **Acknowledgements**

919 The authors thank the study participants, community health workers, and local  
920 clinical staff for their assistance in the conduct of the clinical trials. **Funding:** This study  
921 was supported by the Grand Challenges Explorations in Global Health award from the Bill  
922 and Melinda Gates Foundation (OPP1043255) and the Fulbright Faculty Development  
923 scholarship award.

924 **Author contributions:** For Nicaragua trial: SV, SBD, LY and EPR designed the  
925 research trial and maintained study oversight. ECB, SV, JP, CP and LZ conducted research  
926 in field (including sample collection and processing), and IZ, SM, JP, HI and CP analyzed  
927 stool samples in the lab. For Mali trial: EPR, OK, and AM designed the approved research  
928 protocols for the rice bran intervention with assistance from AB, AC, ECB, and LS. AB  
929 and AC coordinated the study in the community, and LS oversaw sample collection and  
930 field laboratory operations. LD, SD, and KK provided community and participant  
931 engagement, collected samples and data, and carried out laboratory analyses. SM, LZ, IZ,  
932 ECB, HI, ZA and LZ carried out further laboratory and data analyses in the USA. AH, ZA,  
933 HI and LZ compiled the growth, biomarkers, microbial communities and metabolomics  
934 datasets and performed integrated statistical data analysis for both Mali and Nicaragua  
935 sites. LZ, ECB, SM, HI, SV, OK, and EPR collectively interpreted data, carried out the  
936 literature search, constructed tables and figures, and contributed to manuscript preparation.



937 LZ, ECB, SM, HI, ZA and EPR wrote the paper. EPR had primary responsibility for the  
938 final product. All authors read and approved the final manuscript. The authors declare that  
939 they have no competing interests. **Data and materials availability:** *16S* sequence data  
940 were submitted to the National Center for Biotechnology Information SRA under accession  
941 no. (SRP159269) and Bio-project (PRJNA488807).

942

943

944

945

946

**Table 1. Baseline infant participant characteristics from Nicaragua and Mali.**

| Variable                             | Nicaragua         |                     |                      | Mali              |                     |                      |
|--------------------------------------|-------------------|---------------------|----------------------|-------------------|---------------------|----------------------|
|                                      | Control<br>(n=24) | Rice bran<br>(n=23) | p-value <sup>3</sup> | Control<br>(n=24) | Rice bran<br>(n=24) | p-value <sup>3</sup> |
| <b>Sex (%)</b>                       |                   |                     |                      |                   |                     |                      |
| Male                                 | 14 (58.0)         | 12 (52.0)           | 0.6711               | 12 (50)           | 12 (50)             | 1                    |
| Female                               | 10 (42.0)         | 11 (48.0)           |                      | 12 (50)           | 12 (50)             |                      |
| <b>Water source (%)</b>              |                   |                     |                      |                   |                     |                      |
| Indoor municipal                     | 24 (100)          | 23 (100)            | --                   | 0 (0)             | 0 (0)               | --                   |
| Untreated ground water               | 0 (0)             | 0 (0)               | --                   | 24 (100)          | 24 (100)            | --                   |
| <b>Delivery type (%)</b>             |                   |                     |                      |                   |                     |                      |
| Vagina                               | 11 (45.8)         | 16 (69.6)           | 0.099                | 100 (100)         | 100 (100)           | --                   |
| Caesarean                            | 13 (54.2)         | 7 (30.4)            |                      | 0 (0)             | 0 (0)               |                      |
| <b>Sanitation System</b>             |                   |                     |                      |                   |                     |                      |
| None                                 | 0(0)              | 1(4.3)              | --                   | 0(0)              | 0(0)                | --                   |
| Community latrine                    | 0(0)              | 0(0)                | --                   | 21(87.5)          | 19(79.2)            | --                   |
| Latrine                              | 4(16.7)           | 9(39.1)             | --                   | 3(12.5)           | 5(20.8)             | --                   |
| Indoor toilet                        | 20(83.3)          | 13(56.5)            | --                   | 0(0)              | 0(0)                | --                   |
| <b>Mother education (%)</b>          |                   |                     |                      |                   |                     |                      |
| None                                 | 1(4.2)            | 0(0)                | --                   | 12(50)            | 11(46)              | --                   |
| Some primary                         | 3(12.5)           | 7(30.4)             | --                   | 4(17)             | 7(29)               | --                   |
| Completed primary                    | 3(12.5)           | 2(8.7)              | --                   | 6(25)             | 1(4)                | --                   |
| Some secondary                       | 8(33.3)           | 5(21.7)             | --                   | 1(4)              | 2(8)                | --                   |
| Completed secondary                  | 4(16.7)           | 5(21.7)             | --                   | 1(4)              | 3(13)               | --                   |
| University                           | 5(20.8)           | 4(17.4)             | --                   | 0(0)              | 0(0)                | --                   |
| <b>Breastfeeding Status (%)</b>      |                   |                     |                      |                   |                     |                      |
| 6 months                             | 23 (95.8)         | 19 (82.6)           | 0.1415               | 24 (100)          | 24 (100)            | --                   |
| <b>Antibiotic Use (6-12 months)</b>  |                   |                     |                      |                   |                     |                      |
| # Infants antibiotic use             | 14 (58.3)         | 11 (47.8)           | --                   | 14 (58.3)         | 13 (54.2)           | --                   |
| Antibiotic courses                   | 21 (58.3)         | 15 (41.6)           | --                   | 26 (51.0)         | 25 (49.0)           | --                   |
| <b>Household Animals<sup>1</sup></b> |                   |                     |                      |                   |                     |                      |
| Poultry                              | 3(12.5)           | 9(37.5)             | 0.3583               | 21(88)            | 21(88)              | 0.4091               |
| Livestock                            | 2(8.3)            | 2(8.7)              |                      | 21(88)            | 17(71)              |                      |
| Domesticated pets                    | 17(70.8)          | 16(69.6)            |                      | 5(21)             | 1(4)                |                      |
| None                                 | 7(29.2)           | 5(21.7)             |                      | 1(4)              | 2(8)                |                      |
| <b>Anthropometry<sup>2,4</sup></b>   |                   |                     |                      |                   |                     |                      |
| Weight at Birth (kg)                 | 3.17±0.39         | 2.94±0.38           | 0.0505               | 3.07±0.45         | 3.29±0.49           | 0.1146               |
| Weight 6 months (kg)                 | 8.09 ±1.10        | 7.93 ±0.89          | 0.5833               | 7.02±0.88         | 7.14±0.99           | 0.4832               |
| Length Birth (cm)                    | 50.67±1.93        | 49.55±3.03          | 0.1472               | 49.77±1.56        | 50.50±2.04          | 0.1789               |
| Length 6 months (cm)                 | 66.38 ±2.10       | 66.26 ±2.90         | 0.8787               | 65.57±2.56        | 66.56±3.12          | 0.2960               |
| LAZ 0 months (cm)                    | 0.87±0.93         | 0.37±1.60           | 0.2045               | 0.12±0.88         | 0.45±1.18           | 0.3289               |
| LAZ 6 months (cm)                    | -0.03±0.82        | 0.07±1.29           | 0.7325               | -0.30±1.70        | -0.15±1.46          | 0.7427               |
| WAZ 0 months (cm)                    | -0.30±0.85        | -0.82±0.89          | <b>0.0497</b>        | -0.48±1.04        | 0.02±1.06           | 0.1389               |
| WAZ 6 months (cm)                    | 0.33±1.09         | 0.27±0.98           | 0.8412               | -0.65±1.29        | -0.64±1.09          | 0.9827               |
| WLZ 0 months (cm)                    | -1.54±1.41        | -2.07±1.63          | 0.2585               | -0.92±1.31        | -0.39±1.49          | 0.2571               |
| WLZ 6 months (cm)                    | 0.53±1.25         | 0.41±0.96           | 0.7107               | -0.51±0.95        | -0.58±1.05          | 0.7963               |

<sup>1</sup>More than one category may be represented per household. <sup>2</sup>Mean ± standard deviation. <sup>3</sup>p-value:Chi-squared test.

<sup>4</sup>Anthropometric p-values calculated by two-sample t-test.

947

948

**Table 2. Anthropometric measures adjusted by treatment and age in Nicaraguan and Malian Infants**

| Indicator                        | Nicaragua         |                      |                   |                      | Mali              |                      |                   |                      |
|----------------------------------|-------------------|----------------------|-------------------|----------------------|-------------------|----------------------|-------------------|----------------------|
|                                  | Control           |                      | Rice Bran         |                      | Control           |                      | Rice Bran         |                      |
|                                  | n=24 <sup>1</sup> | p-value <sup>2</sup> | n=23 <sup>1</sup> | p-value <sup>2</sup> | n=24 <sup>1</sup> | p-value <sup>2</sup> | n=24 <sup>1</sup> | p-value <sup>2</sup> |
| <b>Length-for-age Z-score</b>    |                   |                      |                   |                      |                   |                      |                   |                      |
| Months                           |                   |                      |                   |                      |                   |                      |                   |                      |
| 6                                | -0.03 (0.17)      | 0.8689               | 0.07 (0.27)       | <b>0.0000</b>        | -0.30 (0.35)      | 0.9165               | -0.15 (0.30)      | 0.1111               |
| 8                                | -0.13 (0.14)      |                      | 1.18 (0.26)       |                      | -0.20 (0.23)      |                      | 0.19 (0.25)       |                      |
| 12                               | -0.73 (0.18)      | <b>0.0098</b>        | 0.35 (0.21)       | <b>0.0002</b>        | -0.58 (0.22)      | 0.1609               | 0.01 (0.22)       | 0.6229               |
| <b>Weight-for-age Z-score</b>    |                   |                      |                   |                      |                   |                      |                   |                      |
| Months                           |                   |                      |                   |                      |                   |                      |                   |                      |
| 6                                | 0.33 (0.22)       | 0.5648               | 0.27 (0.20)       | 0.3335               | -0.65 (0.26)      | 0.4575               | -0.64 (0.22)      | <b>0.0001</b>        |
| 8                                | 0.22 (0.23)       |                      | 0.11 (0.20)       |                      | -0.44 (0.23)      |                      | -0.02 (0.21)      |                      |
| 12                               | -0.03 (0.20)      | 0.0558               | 0.11 (0.18)       | 0.9919               | -1.10 (0.24)      | <b>0.0001</b>        | -0.44 (0.21)      | <b>0.0175</b>        |
| <b>Weight-for-length Z-score</b> |                   |                      |                   |                      |                   |                      |                   |                      |
| Months                           |                   |                      |                   |                      |                   |                      |                   |                      |
| 6                                | 0.53 (0.26)       | 0.8997               | 0.41 (0.20)       | <b>0.0000</b>        | -0.51 (0.19)      | 0.8419               | -0.58 (0.21)      | <b>0.0141</b>        |
| 8                                | 0.44 (0.28)       |                      | -0.54 (0.22)      |                      | -0.36 (0.21)      |                      | -0.05 (0.20)      |                      |
| 12                               | 0.41 (0.22)       | 0.9892               | -0.06 (0.18)      | 0.0569               | -1.18 (0.24)      | <b>0.0000</b>        | -0.59 (0.22)      | <b>0.0134</b>        |

<sup>1</sup>Mean (SEM) <sup>2</sup>Adjusted p-value by repeated measures for each treatment and time point (6-8 and 8-12 months) LAZ: Length for Age Z-score, WAZ: Weight for Age Z-score, WLZ: Weight for Length Z-score.

949

950

951

952

953

954

955

956

957

958

959

960

**Table 3. Environmental enteric dysfunction (EED) biomarkers in stool at 6, 8, and 12 months of age for Nicaraguan and Malian infants.**

| EED Biomarker                      | Nicaragua                      |                                  |                      | Mali                           |                                  |                      |
|------------------------------------|--------------------------------|----------------------------------|----------------------|--------------------------------|----------------------------------|----------------------|
|                                    | Control <sup>1</sup><br>(n=24) | Rice Bran <sup>1</sup><br>(n=23) | p-value <sup>2</sup> | Control <sup>1</sup><br>(n=24) | Rice Bran <sup>1</sup><br>(n=24) | p-value <sup>2</sup> |
| <b>Neopterin (nmol/L)</b>          |                                |                                  |                      |                                |                                  |                      |
| 6                                  | 150.8 (182.2)                  | 208.6 (131.7)                    | 0.7220               | 20.2 (31.0)                    | 34.6 (28.0)                      | 0.5929               |
| 8                                  | 222.3 (241.1)                  | 144.8 (196.9)                    | 0.5771               | 36.2 (27.6)                    | 28.9 (28.5)                      | 0.4314               |
| 12                                 | 137.5 (285.2)                  | 182.4 (230.4)                    | 0.8727               | 12.0 (33.0)                    | 36.0 (32.6)                      | 0.9880               |
| <b>Myeloperoxidase (ng/ml)</b>     |                                |                                  |                      |                                |                                  |                      |
| 6                                  | 277.0 (374.5)                  | 237.5 (376.5)                    | 0.0847               | 3970.6 (17776.6)               | 5400.9 (20794.8)                 | 0.6139               |
| 8                                  | 331.1 (312.3)                  | 266.3 (236.4)                    | 0.8454               | 15838.7 (20511.9)              | 7451.0 (12972.7)                 | 0.3763               |
| 12                                 | 182.0 (324.8)                  | 158.5 (376.7)                    | 0.3345               | 4846.4 (11266.9)               | 3153.9 (14095.2)                 | 0.5437               |
| <b>Calprotectin (µg/g)</b>         |                                |                                  |                      |                                |                                  |                      |
| 6                                  | 32.2 (108.7)                   | 88.0 (281.1)                     | 0.2394               | 51.7 (101.2)                   | 53.3 (106.4)                     | 0.7136               |
| 8                                  | 24.7 (87.5)                    | 58.2 (213.2)                     | 0.8023               | 130.0 (769.7)                  | 68.7 (126.8)                     | 0.0639               |
| 12                                 | 24.0 (74.4)                    | 50.5 (133.9)                     | 0.2629               | 35.0 (70.2)                    | 20.9 (56.0)                      | 0.2103               |
| <b>Alpha-1 Antitrypsin (ng/ml)</b> |                                |                                  |                      |                                |                                  |                      |
| 6                                  | 130.1 (177.7)                  | 109.5 (217.4)                    | 0.7199               | 247.5 (499.6)                  | 463.1 (891.8)                    | 0.0999               |
| 8                                  | 152.0 (115.4)                  | 73.5 (122.4)                     | 0.1221               | 619.2 (759.0)                  | 579.9 (899.9)                    | 0.2237               |
| 12                                 | 130.9 (129.8)                  | 70.8 (87.8)                      | <b>0.0368</b>        | 663.7 (580.5)                  | 453.2 (807.5)                    | 0.4796               |

<sup>1</sup>Median (IQR)

<sup>2</sup>p-value by repeated measures comparing treatments at each time point.

961

962

963

964

965

966

967

968

969

970

971

972

973

974

**Table 4. Stool metabolites significantly modulated by rice bran supplementation compared to control for Nicaragua & Mali infants at 8 months of age.**

| Metabolic Pathway                        | Metabolite <sup>1</sup>              | HMDB <sup>2</sup>         | Nicaragua              |         | Mali                   |         |
|------------------------------------------|--------------------------------------|---------------------------|------------------------|---------|------------------------|---------|
|                                          |                                      |                           | Fold Diff <sup>3</sup> | p-value | Fold Diff <sup>3</sup> | p-value |
| <b>Cofactors and Vitamins</b>            |                                      |                           |                        |         |                        |         |
| Nicotinate and Nicotinamide Metabolism   | Quinolate                            | <a href="#">HMDB00232</a> | 0.88                   | 0.7272  | 0.44                   | 0.0313  |
|                                          | <b>Nicotinate</b>                    | <a href="#">HMDB01488</a> | 1.15                   | 0.3958  | 1.6                    | 0.0053  |
| Tocopherol Metabolism                    | <b>alpha-tocotrienol</b>             | <a href="#">HMDB06327</a> | 0.69                   | 0.3922  | 3.01                   | 0.0168  |
|                                          | <b>gamma-tocotrienol</b>             | <a href="#">HMDB12958</a> | 0.67                   | 0.1909  | 2.53                   | 0.0044  |
|                                          | gamma-CEHC glucuronide*              |                           | 0.41                   | 0.0035  | 0.96                   | 0.8862  |
| Vitamin B6 Metabolism                    | <b>pyridoxine (Vitamin B6)</b>       | <a href="#">HMDB02075</a> | 1.58                   | 0.3051  | 4.65                   | 0.0011  |
|                                          | <b>Pyridoxate</b>                    | <a href="#">HMDB00017</a> | 0.86                   | 0.5441  | 2.34                   | 0.0014  |
| <b>Xenobiotics</b>                       |                                      |                           |                        |         |                        |         |
| Benzoate Metabolism                      | <b>4-hydroxybenzoate</b>             | <a href="#">HMDB00500</a> | 0.88                   | 0.6260  | 1.8                    | 0.0272  |
|                                          | methyl-4-hydroxybenzoate             | <a href="#">HMDB32572</a> | 0.57                   | 0.0299  | 0.9                    | 0.7061  |
|                                          | <b>3-(4-hydroxyphenyl)propionate</b> | <a href="#">HMDB02199</a> | 1.08                   | 0.8898  | 6.94                   | 0.0007  |
| Xanthine Metabolism                      | <b>Theophylline</b>                  | <a href="#">HMDB01889</a> | 0.86                   | 0.6266  | 0.44                   | 0.0091  |
| Food Component/Plant                     | <b>Indoleacetylaspartate</b>         | <a href="#">HMDB38666</a> | 1.1                    | 0.7543  | 2.14                   | 0.0134  |
|                                          | <b>Vanillate</b>                     | <a href="#">HMDB00484</a> | 0.82                   | 0.5775  | 2.27                   | 0.0246  |
|                                          | deoxymugineic acid                   |                           | 0.6                    | 0.2733  | 4.5                    | 0.0021  |
|                                          | <b>dihydroferulic acid</b>           |                           | 0.63                   | 0.4522  | 6.99                   | 0.0032  |
|                                          | <b>Ferulate</b>                      | <a href="#">HMDB00954</a> | 1.24                   | 0.6403  | 3.5                    | 0.0100  |
|                                          | <b>ferulic acid 4-sulfate</b>        | <a href="#">HMDB29200</a> | 1.14                   | 0.8494  | 4.88                   | 0.0274  |
|                                          | ferulylglycine (1)                   |                           | 0.4                    | 0.0256  | 2.16                   | 0.0665  |
|                                          | Rosmarinate                          | <a href="#">HMDB03572</a> | 0.57                   | 0.0206  | 1.28                   | 0.3008  |
|                                          | <b>Tyrosol</b>                       | <a href="#">HMDB04284</a> | 1.01                   | 0.9832  | 1.98                   | 0.0412  |
|                                          | <b>Diosmetin</b>                     | <a href="#">HMDB29676</a> | 0.29                   | 0.0192  | 1.25                   | 0.6872  |
|                                          | daidzein sulfate (2)                 |                           | 0.39                   | 0.0123  | 1.38                   | 0.4129  |
|                                          | daidzein sulfate (1)                 |                           | 0.35                   | 0.0023  | 1.04                   | 0.9083  |
|                                          | <b>Salicylate</b>                    | <a href="#">HMDB01895</a> | 1.78                   | 0.0970  | 4.67                   | 0.0000  |
|                                          | <b>N-propionylmethionine</b>         |                           | 1.09                   | 0.8631  | 3.6                    | 0.0111  |
|                                          | malonylgenistin                      |                           | 0.51                   | 0.0023  | 0.99                   | 0.9670  |
| Drug - Analgesics, Anesthetics           | 4-acetamidophenylglucuronide         | <a href="#">HMDB10316</a> | 0.99                   | 0.0484  | 1                      | 1.0000  |
|                                          | 2-methoxyacetaminophen glucuronide*  |                           | 0.77                   | 0.0049  | 1                      | 1.0000  |
| <b>Amino Acid</b>                        |                                      |                           |                        |         |                        |         |
| Glycine, Serine and Threonine Metabolism | <b>Glycine</b>                       | <a href="#">HMDB00123</a> | 0.66                   | 0.0062  | 1.2                    | 0.2384  |
|                                          | dimethylglycine                      | <a href="#">HMDB00092</a> | 0.69                   | 0.2880  | 0.42                   | 0.0153  |
| Lysine Metabolism                        | N6-formyllysine                      |                           | 0.6                    | 0.1944  | 2.37                   | 0.0385  |
| Phenylalanine Metabolism                 | <b>phenylpyruvate</b>                | <a href="#">HMDB00205</a> | 0.59                   | 0.0332  | 1.18                   | 0.5305  |
|                                          | <b>phenyllactate (PLA)</b>           | <a href="#">HMDB00779</a> | 0.44                   | 0.0223  | 1.49                   | 0.2855  |
| Tyrosine Metabolism                      | <b>4-hydroxyphenylpyruvate</b>       | <a href="#">HMDB00707</a> | 0.55                   | 0.0210  | 0.92                   | 0.7455  |
|                                          | vanillic alcohol sulfate             |                           | 0.7                    | 0.2572  | 2.01                   | 0.0378  |
| Tryptophan Metabolism                    | <b>kynurenate</b>                    | <a href="#">HMDB00715</a> | 0.48                   | 0.0079  | 1.13                   | 0.6565  |

|                                                      |                                                     |                           |      |        |      |        |
|------------------------------------------------------|-----------------------------------------------------|---------------------------|------|--------|------|--------|
|                                                      | N-formylanthranilic acid                            | <a href="#">HMDB04089</a> | 1.2  | 0.5416 | 0.51 | 0.0321 |
|                                                      | <b>indolepropionate</b>                             | <a href="#">HMDB02302</a> | 4.67 | 0.0189 | 1.33 | 0.6727 |
| Leucine, Isoleucine and Valine Metabolism            | <b>alpha-hydroxyisocaproate</b>                     | <a href="#">HMDB00746</a> | 0.45 | 0.0325 | 1.05 | 0.8904 |
|                                                      | <b>alpha-hydroxyisovalerate</b>                     | <a href="#">HMDB00407</a> | 0.47 | 0.0335 | 1.08 | 0.8323 |
|                                                      | <b>3-methyl-2-oxobutyrate</b>                       | <a href="#">HMDB00019</a> | 0.52 | 0.0299 | 1.4  | 0.2751 |
|                                                      | <b>2-hydroxy-3-methylvalerate</b>                   | <a href="#">HMDB00317</a> | 0.46 | 0.0224 | 1.14 | 0.7078 |
| Methionine, Cysteine, SAM and Taurine Metabolism     | <b>N-acetylmethionine</b>                           | <a href="#">HMDB11745</a> | 0.89 | 0.8154 | 3.24 | 0.0214 |
|                                                      | <b>N-formylmethionine</b>                           | <a href="#">HMDB01015</a> | 0.56 | 0.2035 | 2.84 | 0.0294 |
|                                                      | <b>cysteine</b>                                     | <a href="#">HMDB00574</a> | 0.66 | 0.0498 | 1.29 | 0.2445 |
|                                                      | hypotaurine                                         | <a href="#">HMDB00965</a> | 0.52 | 0.0439 | 0.9  | 0.7512 |
| Urea cycle; Arginine and Proline Metabolism          | <b>dimethylarginine (SDMA + ADMA)</b>               | <a href="#">HMDB01539</a> | 0.53 | 0.0064 | 0.92 | 0.7445 |
| Glutathione Metabolism                               | <b>5-oxoproline</b>                                 | <a href="#">HMDB00267</a> | 0.5  | 0.0085 | 1.27 | 0.3819 |
|                                                      | 2-hydroxybutyrate/2-hydroxyisobutyrate              |                           | 0.45 | 0.0153 | 0.73 | 0.3554 |
| <b>Peptide</b>                                       |                                                     |                           |      |        |      |        |
| Gamma-glutamyl Amino Acid                            | <b>gamma-glutamylglutamine</b>                      | <a href="#">HMDB11738</a> | 0.49 | 0.0278 | 1.05 | 0.8844 |
|                                                      | gamma-glutamyl-epsilon-lysine                       | <a href="#">HMDB03869</a> | 0.49 | 0.0137 | 0.84 | 0.5553 |
| <b>Carbohydrate</b>                                  |                                                     |                           |      |        |      |        |
| Glycolysis, Gluconeogenesis, and Pyruvate Metabolism | <b>pyruvate</b>                                     | <a href="#">HMDB00243</a> | 0.46 | 0.0237 | 1.26 | 0.5202 |
| Disaccharides and Oligosaccharides                   | 3-sialyllactose                                     | <a href="#">HMDB00825</a> | 0.8  | 0.0484 | 1    | 1.0000 |
|                                                      | Lewis a trisaccharide                               |                           | 1.36 | 0.0443 | 0.99 | 0.9520 |
| <b>Energy</b>                                        |                                                     |                           |      |        |      |        |
| TCA Cycle                                            | <b>alpha-ketoglutarate</b>                          | <a href="#">HMDB00208</a> | 0.65 | 0.1785 | 1.96 | 0.0484 |
| <b>Lipid</b>                                         |                                                     |                           |      |        |      |        |
| Fatty Acid, Dicarboxylate                            | pimelate (C7-DC)                                    | <a href="#">HMDB00857</a> | 0.93 | 0.7811 | 2.13 | 0.0078 |
| Fatty Acid Metabolism (Acyl Choline)                 | palmitoleoylcholine                                 |                           | 1.17 | 0.1301 | 0.74 | 0.0070 |
|                                                      | linoleoylcholine*                                   |                           | 1.85 | 0.0459 | 1.5  | 0.2118 |
| Fatty Acid, Monohydroxy                              | <b>8-hydroxyoctanoate</b>                           | <a href="#">HMDB61914</a> | 0.75 | 0.1576 | 1.61 | 0.0224 |
| Fatty Acid, Dihydroxy                                | <b>12,13-DiHOME</b>                                 | <a href="#">HMDB04705</a> | 0.89 | 0.7839 | 2.78 | 0.0246 |
|                                                      | <b>9,10-DiHOME</b>                                  | <a href="#">HMDB04704</a> | 0.9  | 0.7816 | 3.75 | 0.0012 |
| Monoacylglycerol                                     | 1-linolenylglycerol (18:3)                          | <a href="#">HMDB11569</a> | 2.36 | 0.0457 | 1.01 | 0.9871 |
|                                                      | linoleoyl-linolenyl-glycerol (18:2/18:3) [1]*       | <a href="#">HMDB07249</a> | 2.04 | 0.0285 | 1.18 | 0.6201 |
|                                                      | linolenyl-linolenyl-glycerol (18:3/18:3) [2]*       | <a href="#">HMDB07278</a> | 2.29 | 0.0404 | 0.76 | 0.5121 |
|                                                      | linoleoyl-docosahexaenoyl-glycerol (18:2/22:6) [1]* |                           | 1.03 | 0.8045 | 0.66 | 0.0006 |
|                                                      | linoleoyl-docosahexaenoyl-glycerol (18:2/22:6) [2]* | <a href="#">HMDB07266</a> | 0.98 | 0.9291 | 0.59 | 0.0165 |
| Sphingolipid Metabolism                              | <b>N-acetyl sphingosine</b>                         | <a href="#">HMDB04950</a> | 1.11 | 0.7987 | 2.44 | 0.0387 |
| Mevalonate Metabolism                                | <b>3-hydroxy-3-methylglutarate</b>                  | <a href="#">HMDB00355</a> | 0.74 | 0.4206 | 2.77 | 0.0098 |
| Sterol                                               | <b>beta-sitosterol</b>                              | <a href="#">HMDB00852</a> | 0.77 | 0.3699 | 2.89 | 0.0006 |
|                                                      | <b>stigmasterol</b>                                 | <a href="#">HMDB00937</a> | 1.14 | 0.6191 | 2.01 | 0.0159 |
|                                                      | <b>campesterol</b>                                  | <a href="#">HMDB02869</a> | 0.86 | 0.6689 | 2.1  | 0.0415 |

|                                           |                                                       |                           |      |        |      |        |
|-------------------------------------------|-------------------------------------------------------|---------------------------|------|--------|------|--------|
| Androgenic Steroids                       | <b>5alpha-androstan-3alpha,17alpha-diol disulfate</b> |                           | 0.56 | 0.0199 | 0.63 | 0.0625 |
|                                           | androstenediol (3beta,17beta) disulfate (2)           | <a href="#">HMDB03818</a> | 0.71 | 0.2185 | 0.54 | 0.0324 |
| Primary Bile Acid Metabolism              | <b>glycocholate</b>                                   | <a href="#">HMDB00138</a> | 0.39 | 0.0483 | 1.37 | 0.5237 |
|                                           | <b>glycochenodeoxycholate</b>                         | <a href="#">HMDB00637</a> | 0.43 | 0.0434 | 0.64 | 0.3052 |
|                                           | glycochenodeoxycholate glucuronide (2)                |                           | 0.37 | 0.0195 | 0.78 | 0.5717 |
|                                           | glycochenodeoxycholate sulfate                        |                           | 0.57 | 0.2283 | 0.35 | 0.0284 |
| Secondary Bile Acid Metabolism            | 7alpha-hydroxycholestenone                            | <a href="#">HMDB01993</a> | 0.64 | 0.0411 | 0.88 | 0.5716 |
| <b>Nucleotide</b>                         |                                                       |                           |      |        |      |        |
| Purine Metabolism, Adenine containing     | N6-dimethylallyladenine                               |                           | 0.94 | 0.8249 | 0.28 | 0.0000 |
| Purine Metabolism, Guanine containing     | <b>Guanine</b>                                        | <a href="#">HMDB00132</a> | 0.47 | 0.0876 | 3.22 | 0.0112 |
| Pyrimidine Metabolism, Orotate containing | <b>N-carbamoylaspartate</b>                           | <a href="#">HMDB00828</a> | 1.14 | 0.5814 | 0.59 | 0.0326 |
| Pyrimidine Metabolism, Uracil containing  | <b>uridine-2',3'-cyclic monophosphate</b>             | <a href="#">HMDB11640</a> | 1.27 | 0.3081 | 1.75 | 0.0243 |
| Pyrimidine Metabolism, Thymine containing | <b>3-aminoisobutyrate</b>                             | <a href="#">HMDB03911</a> | 1.23 | 0.6961 | 0.27 | 0.0175 |

<sup>1</sup>Table displays metabolites with statistically significant differences between rice bran and control group in stool. Bold metabolites are present in the rice bran (Calrose) that the children consumed.

<sup>2</sup>HMDB refers to the Human Metabolome Database.

<sup>3</sup>Fold differences (Fold Diff) between study groups was calculated by dividing the scaled relative abundance of rice bran vs control.

975

976

977

978

979

980

981

982

983

984

985

986

987

988 **Figures:**

989 **Fig. 1. Study recruitment and participation based on CONSORT statement guidelines**

990 **for clinical trials conducted in Nicaragua and Mali (NCT02615886, NCT0255737315).**

991 95 infants from León, Nicaragua and Dioro, Mali enrolled after meeting eligibility criteria,

992 randomized by sex and location to one of two study arms. The number of diarrhea episodes

993 and reasons for withdrawal were reported for each child.

994

995 **Fig. 2. Anthropometric Z-scores for Nicaraguan and Malian infants in rice bran and**

996 **control groups at 6, 8 and 12 months. A).** Significant LAZ ( $p < 0.05$ ) at 8 and 12 months

997 in the rice bran group compared to control for Nicaraguan infants. B). No WAZ significant

998 changes between rice bran and control group in Nicaraguan and Malian infants. C). WLZ at

999 8 months was significantly lower for the rice bran group compared to control in Nicaragua.

1000

1001 **Fig.3. Rice bran and control infant stool microbiome at 8 and 12 months of age in**

1002 **Nicaragua and Mali.** Nonmetric Multidimensional Scaling (NMDS) for A). Nicaragua and

1003 Mali all samples B). Control groups and rice bran groups at 8 and 12 months. NMDS was

1004 used on the OTU level to assess possible trends and clustering in the microbial community

1005 structure per treatment and time point. C). Bacterial taxa at phylum and family level in

1006 Nicaragua (top) and Mali (bottom). Bar-graphs show phylum and family relative abundance

1007 based on the resulting OTU table generated using the ggplot2 package in R. These plots

1008 were generated for the data at the phylum and the family levels and meant to describe the



1009 microbial community structure per sampled group and per time point (8 months and 12  
1010 months) under each of the treatment levels (control and rice bran).

1011

1012 **Fig. 4. Microbiome differences between Nicaragua and Mali at 8 and 12 months**

1013 **between rice bran and control groups.** Fold differences in relative percentage of OTUs

1014 different between control and rice bran groups at 8 months and 12 months. A) Nicaragua,

1015 and B) Mali. OTUs with fold difference more than 2 are shown for infants at 8 months

1016 (left) and 12 months (right). Fold difference for OTUs with FDR less than 0.05 is shown

1017 with the most significant OTUs on the bottom of each graph.

1018

1019

1020

1021

1022

1023

1024

1025

1026

1027

1028

1029

1030

1031

**Figure 1.**

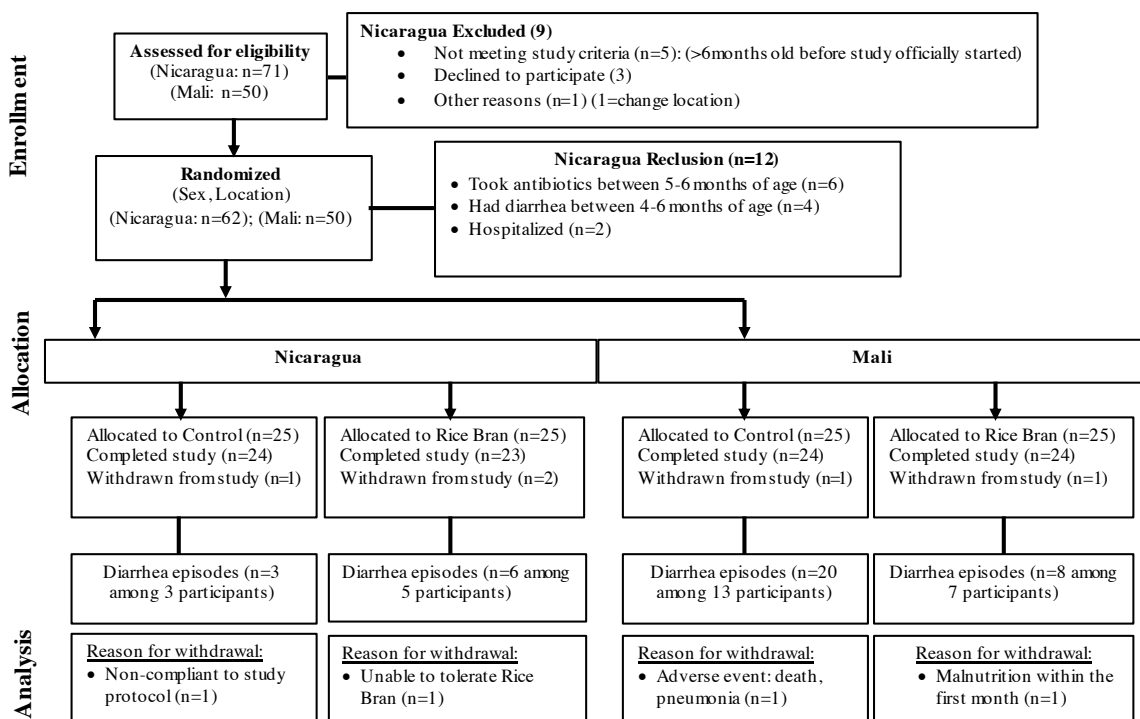

Figure 2

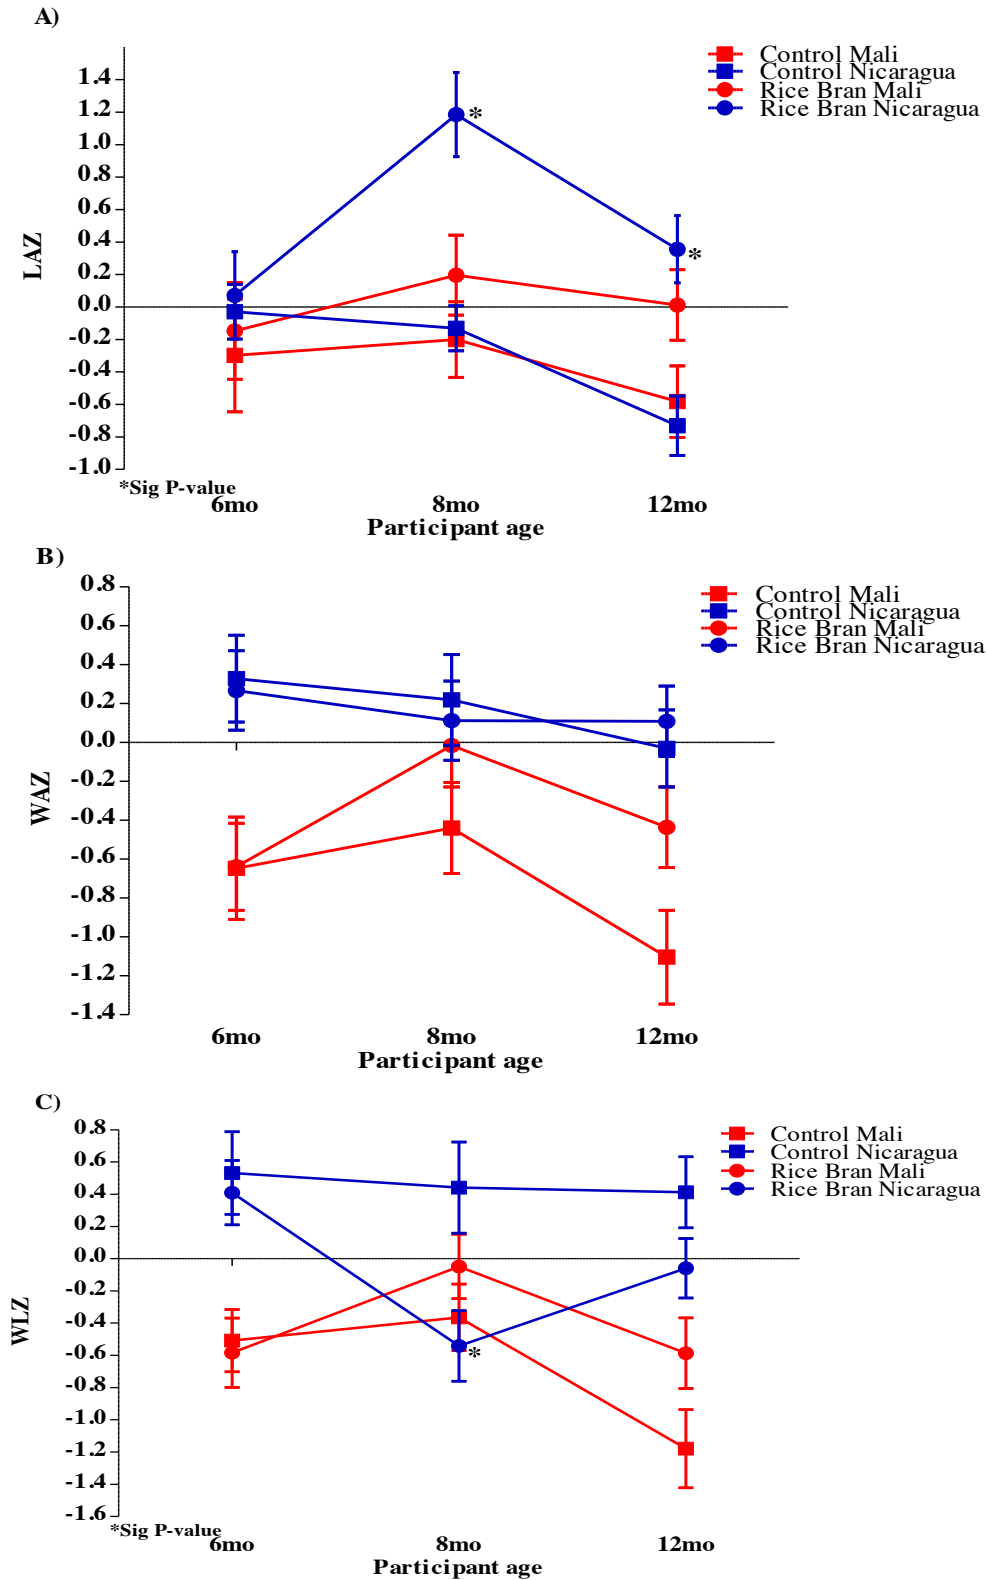

**Figure 3**

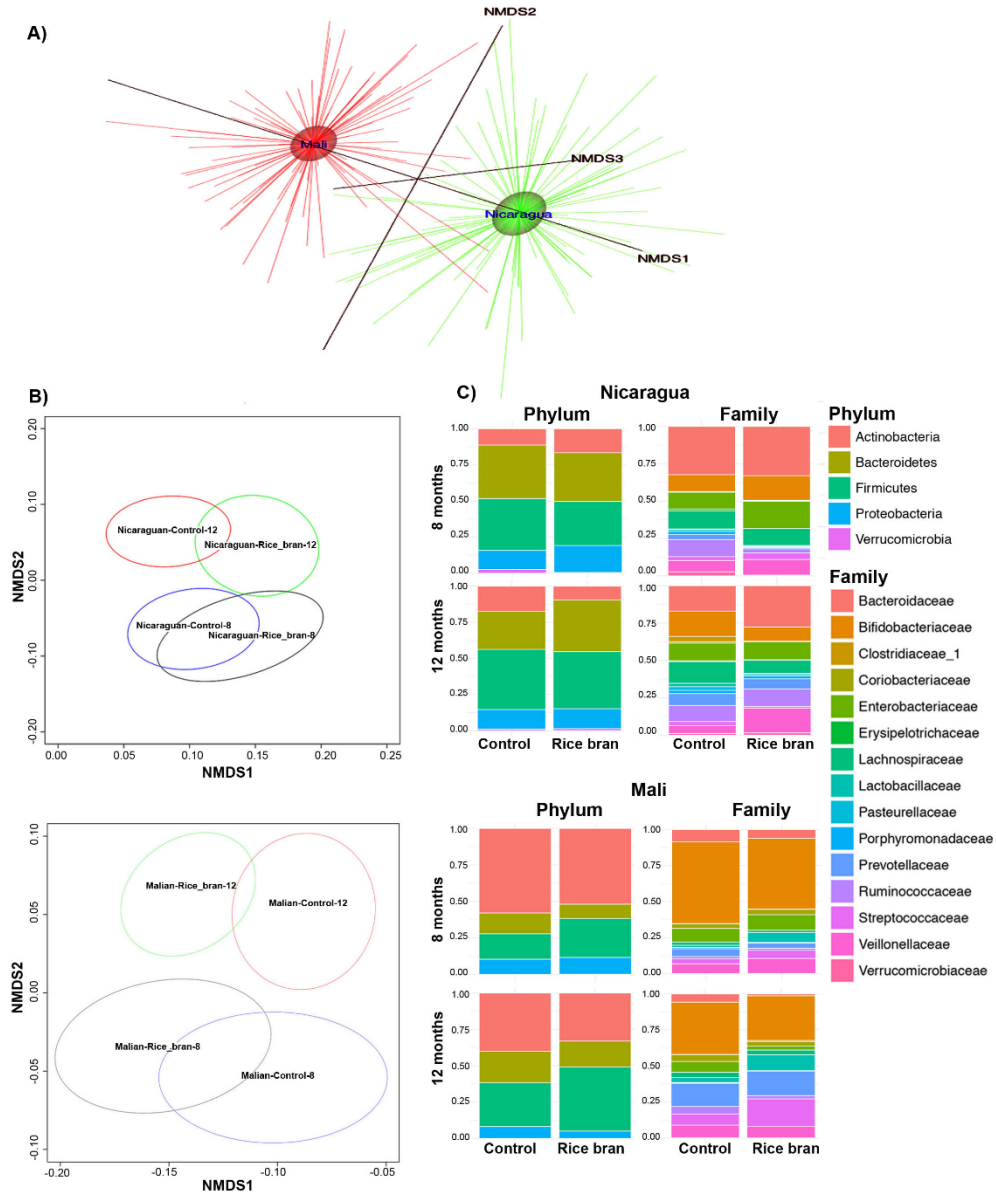

**Figure 4.**

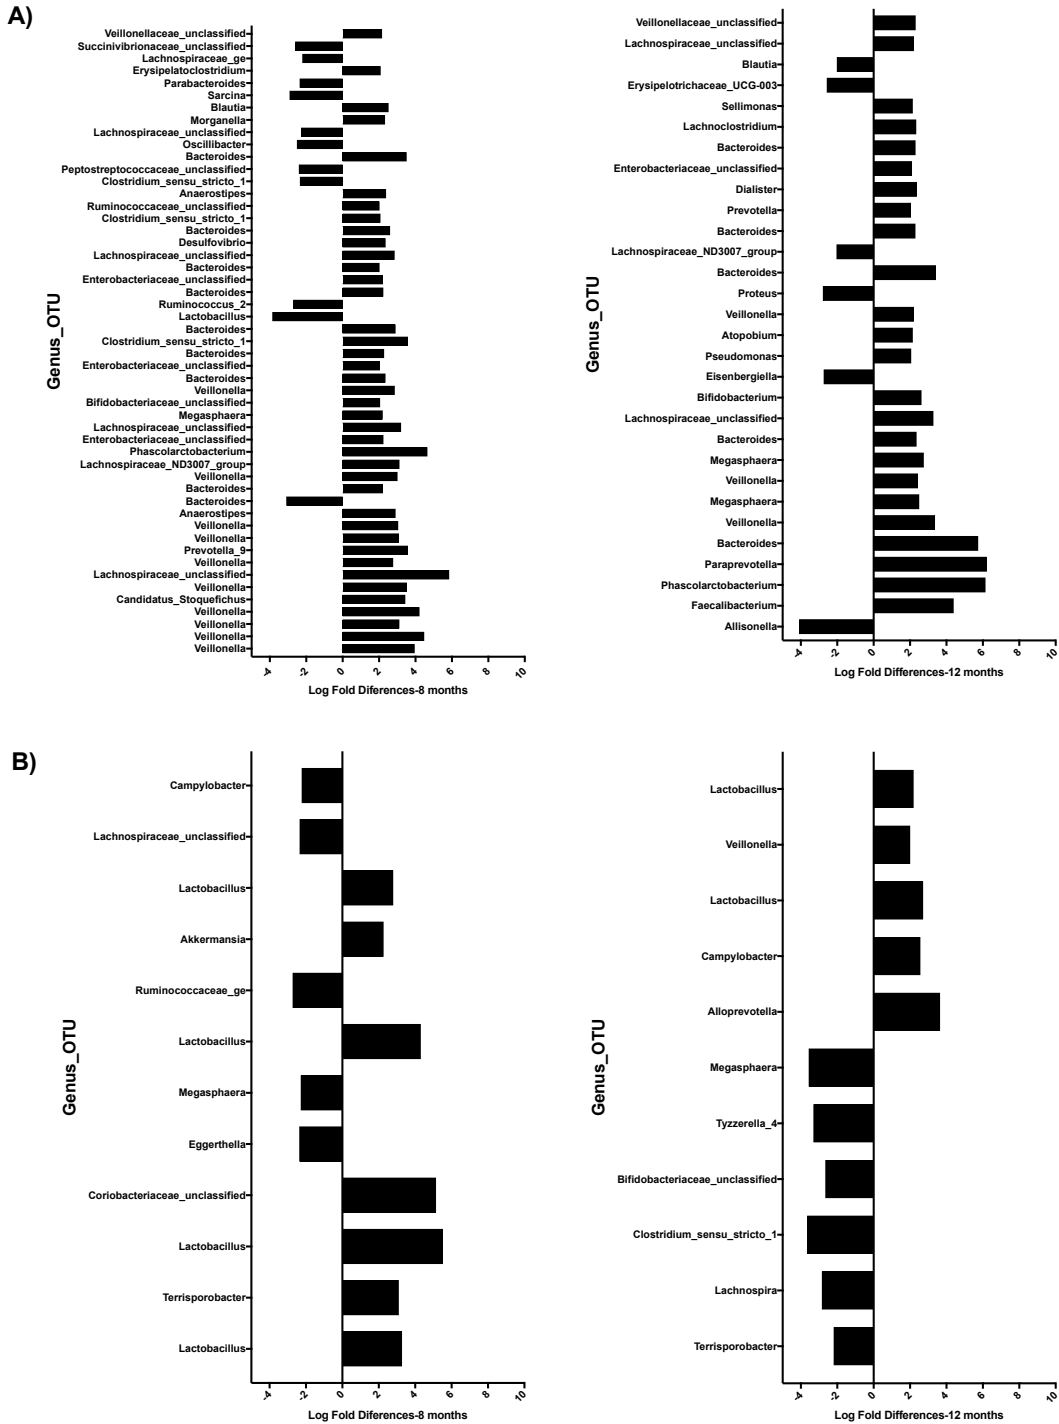

Source: http://biorxiv.org/content/10.1101/530089v1.full.pdf
